# Supplementary material for: A feasible protocol to profile bile acids in dried blood spots from rats using a UHPLC-MS/MS method combining a surrogate matrix
Source: Royal Society of Chemistry journal article supplement (doi:10.1039/d3an00900a), 2023-01-01
Supplement: d3an00900a1.pdf [file d3an00900a1.pdf]

**Table S1** Concentration of series working solutions and LQC, MQC, HQC for different BAs

| NO. | Analytes                  | Concentration of STD solutions (nmol/L)          | LQC<br>(nmol/L) | MQC<br>(nmol/L) | HQC<br>(nmol/L) |
|-----|---------------------------|--------------------------------------------------|-----------------|-----------------|-----------------|
| 1   | ALCA                      | 50, 100, 200, 500, 1000, 1500, 2000              | 100             | 500             | 1500            |
| 2   | LCA                       | 50, 100, 200, 500, 1000, 1500, 2000              | 100             | 500             | 1500            |
| 3   | NDCA                      | 50, 100, 200, 500, 1000, 1500, 2000              | 100             | 500             | 1500            |
| 4   | ACA                       | 50, 100, 200, 500, 1000, 1500, 2000              | 100             | 500             | 1500            |
| 5   | IDCA                      | 50, 100, 200, 500, 1000, 1500, 2000              | 100             | 500             | 1500            |
| 6   | UDCA                      | 2, 5, 10, 20, 50, 100, 200, 500, 1000, 1500,2000 | 5               | 200             | 1500            |
| 7   | HDCA                      | 50, 100, 200, 500, 1000, 1500, 2000              | 100             | 500             | 1500            |
| 8   | CDCA                      | 2, 5, 10, 20, 50, 100, 200, 500, 1000, 1500,2000 | 5               | 200             | 1500            |
| 9   | $\omega$ -MA              | 2, 5, 10, 20, 50, 100, 200, 500, 1000, 1500,2000 | 5               | 200             | 1500            |
| 10  | $\alpha$ -MA              | 2, 5, 10, 20, 50, 100, 200, 500, 1000, 1500,2000 | 5               | 200             | 1500            |
| 11  | $\beta$ -MA               | 2, 5, 10, 20, 50, 100, 200, 500, 1000, 1500,2000 | 5               | 200             | 1500            |
| 12  | $\gamma$ -MA(HCA)         | 2, 5, 10, 20, 50, 100, 200, 500, 1000, 1500,2000 | 5               | 200             | 1500            |
| 13  | CA                        | 2, 5, 10, 20, 50, 100, 200, 500, 1000, 1500,2000 | 5               | 200             | 1500            |
| 14  | DLCA                      | 50, 100, 200, 500, 1000, 1500, 2000              | 100             | 500             | 1500            |
| 15  | $\beta$ -DCDCA            | 50, 100, 200, 500, 1000, 1500, 2000              | 100             | 500             | 1500            |
| 16  | DCDCA                     | 50, 100, 200, 500, 1000, 1500, 2000              | 100             | 500             | 1500            |
| 17  | AlloCA                    | 50, 100, 200, 500, 1000, 1500, 2000              | 100             | 500             | 1500            |
| 18  | 12k-LCA                   | 50, 100, 200, 500, 1000, 1500, 2000              | 100             | 500             | 1500            |
| 19  | 3,7,12-Trione             | 50, 100, 200, 500, 1000, 1500, 2000              | 100             | 500             | 1500            |
| 20  | 7,12 dk-LCA               | 20, 50, 100, 200, 500, 1000, 1500,2000           | 50              | 200             | 1500            |
| 21  | Methyl Ester              | 100, 200, 500, 1000, 1500,2000                   | 200             | 500             | 1500            |
| 22  | GLCA                      | 2, 5, 10, 20, 50, 100, 200, 500, 1000, 1500,2000 | 5               | 200             | 1500            |
| 23  | GUDCA                     | 2, 5, 10, 20, 50, 100, 200, 500, 1000, 1500,2000 | 5               | 200             | 1500            |
| 24  | GCDCA                     | 2, 5, 10, 20, 50, 100, 200, 500, 1000, 1500,2000 | 5               | 200             | 1500            |
| 25  | GDCA                      | 2, 5, 10, 20, 50, 100, 200, 500, 1000, 1500,2000 | 5               | 200             | 1500            |
| 26  | G $\beta$ -MA             | 2, 5, 10, 20, 50, 100, 200, 500, 1000, 1500,2000 | 5               | 200             | 1500            |
| 27  | GCA                       | 2, 5, 10, 20, 50, 100, 200, 500, 1000, 1500,2000 | 5               | 200             | 1500            |
| 28  | Glyco-3, 7, 12-<br>Trione | 2, 5, 10, 20, 50, 100, 200, 500, 1000, 1500,2000 | 5               | 200             | 1500            |
| 29  | TLCA                      | 2, 5, 10, 20, 50, 100, 200, 500, 1000, 1500,2000 | 5               | 200             | 1500            |
| 30  | TDCA                      | 2, 5, 10, 20, 50, 100, 200, 500, 1000, 1500,2000 | 5               | 200             | 1500            |
| 31  | TUDCA                     | 2, 5, 10, 20, 50, 100, 200, 500, 1000, 1500,2000 | 5               | 200             | 1500            |
| 32  | TCDCDA                    | 2, 5, 10, 20, 50, 100, 200, 500, 1000, 1500,2000 | 5               | 200             | 1500            |
| 33  | T $\beta$ -MA             | 2, 5, 10, 20, 50, 100, 200, 500, 1000, 1500,2000 | 5               | 200             | 1500            |
| 34  | THCA                      | 2, 5, 10, 20, 50, 100, 200, 500, 1000, 1500,2000 | 5               | 200             | 1500            |
| 35  | TCA                       | 2, 5, 10, 20, 50, 100, 200, 500, 1000, 1500,2000 | 5               | 200             | 1500            |

**Table S2** Structures and fragmentation patterns of all analytes along with deuterated internal standards.

| Type     | Structures of analytes |                | Fragmentation patterns |              |              |    |     |                 |
|----------|------------------------|----------------|------------------------|--------------|--------------|----|-----|-----------------|
|          |                        |                |                        |              |              |    |     |                 |
|          | NO.                    | Compound       | R1                     | R2           | R3           | R4 | R5  | Other positions |
| Free BAs | 1                      | ALCA           | OH                     | H            | H            | H  | H   | 5 $\alpha$ -H   |
|          | 2                      | LCA            | OH                     | H            | H            | H  | H   | 5 $\beta$ -H    |
|          | 3                      | NDCA           | OH                     | H            | H            | OH | H   |                 |
|          | 4                      | ACA            | OH                     | H            | H            | OH | H   | 8(14)-en        |
|          | 5                      | IDCA           | H                      | H            | $\alpha$ -OH | OH | H   |                 |
|          | 6                      | UDCA           | OH                     | H            | $\beta$ -OH  | H  | H   |                 |
|          | 7                      | HDCA           | OH                     | $\alpha$ -OH | H            | H  | H   |                 |
|          | 8                      | CDCA           | OH                     | H            | $\alpha$ -OH | H  | H   |                 |
|          | 9                      | $\omega$ -MA   | OH                     | $\alpha$ -OH | $\beta$ -OH  | H  | H   |                 |
|          | 10                     | $\alpha$ -MA   | OH                     | $\beta$ -OH  | $\alpha$ -OH | H  | H   |                 |
|          | 11                     | $\beta$ -MA    | OH                     | $\beta$ -OH  | $\beta$ -OH  | H  | H   |                 |
|          | 12                     | HCA            | OH                     | $\alpha$ -OH | $\alpha$ -OH | H  | H   |                 |
|          | 13                     | CA             | OH                     | H            | $\alpha$ -OH | OH | H   |                 |
|          | 14                     | DLCA           | =O                     | H            | H            | H  | H   |                 |
|          | 15                     | $\beta$ -DCDCA | =O                     | H            | =O           | H  | H   |                 |
|          | 16                     | DCDCA          | =O                     | =O           | H            | H  | H   |                 |
|          | 17                     | AlloCA         | OH                     | =O           | H            | H  | H   |                 |
|          | 18                     | 12k-LCA        | OH                     | H            | H            | =O | H   |                 |
|          | 19                     | 3,7,12-Trione  | =O                     | H            | =O           | =O | H   |                 |
|          | 20                     | 7,12 dk-LCA    | OH                     | H            | =O           | =O | H   |                 |
|          | 21                     | Methyl Ester   | OH                     | H            | =O           | OH | CH3 |                 |
|          | 22                     | CA-d4          | OH                     | H            | $\alpha$ -OH | OH | H   | 2,2,4,4-D4      |

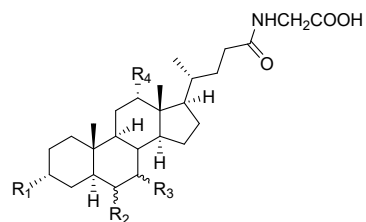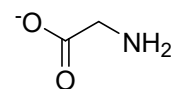

| Glycine-<br>conjugated<br>BAs | NO. | Compound              | R1 | R2          | R3           | R4 | Other positions          |            |
|-------------------------------|-----|-----------------------|----|-------------|--------------|----|--------------------------|------------|
|                               |     |                       |    |             |              |    |                          |            |
|                               | 1   | GLCA                  | OH | H           | H            | H  |                          |            |
|                               | 2   | GUDCA                 | OH | H           | $\beta$ -OH  | H  |                          |            |
|                               | 3   | GCDCA                 | OH | H           | $\alpha$ -OH | H  |                          |            |
|                               | 4   | GDCA                  | OH | H           | H            | OH |                          |            |
|                               | 5   | G $\beta$ -MA         | OH | $\beta$ -OH | $\beta$ -OH  | H  |                          |            |
|                               | 6   | GCA                   | OH | H           | $\alpha$ -OH | OH |                          |            |
|                               | 7   | Glyco-3, 7, 12-Trione | =O | H           | =O           | =O |                          |            |
|                               | 8   | GCA-d4                | OH | H           | $\alpha$ -OH | OH | <input type="checkbox"/> | 2,2,4,4-D4 |

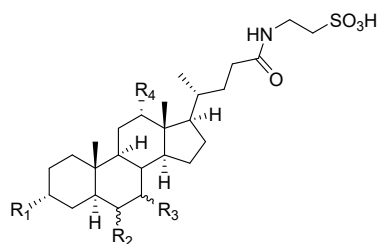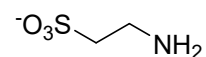

| Taurine-<br>conjugated<br>BAs | NO. | Compound      | R1 | R2           | R3           | R4 | Other positions          |            |
|-------------------------------|-----|---------------|----|--------------|--------------|----|--------------------------|------------|
|                               |     |               |    |              |              |    |                          |            |
|                               | 1   | TLCA          | OH | H            | H            | H  |                          |            |
|                               | 2   | TDCA          | OH | H            | H            | OH |                          |            |
|                               | 3   | TUDCA         | OH | H            | $\beta$ -OH  | H  |                          |            |
|                               | 4   | TCDCa         | OH | H            | $\alpha$ -OH | H  |                          |            |
|                               | 5   | T $\beta$ -MA | OH | $\beta$ -OH  | $\beta$ -OH  | H  |                          |            |
|                               | 6   | THCA          | OH | $\alpha$ -OH | $\alpha$ -OH | H  |                          |            |
|                               | 7   | TCA           | OH | H            | $\alpha$ -OH | OH |                          |            |
|                               | 8   | TCA-d4        | OH | H            | $\alpha$ -OH | OH | <input type="checkbox"/> | 2,2,4,4-D4 |

**Table S3** Descriptives  
and Tukey analysis  
data of all analytes.

|      |             | Descriptives |        |                |            |                                  |             |         |         |
|------|-------------|--------------|--------|----------------|------------|----------------------------------|-------------|---------|---------|
|      |             |              |        |                |            | 95% Confidence Interval for Mean |             |         |         |
|      |             | N            | Mean   | Std. Deviation | Std. Error | Lower Bound                      | Upper Bound | Minimum | Maximum |
| ALCA | MeOH        | 3            | 0.0436 | 0.02204        | 0.01272    | -0.0111                          | 0.0983      | 0.02    | 0.06    |
|      | ACN         | 3            | 0.0494 | 0.01051        | 0.00607    | 0.0233                           | 0.0755      | 0.04    | 0.06    |
|      | IPA         | 3            | 0.2045 | 0.28177        | 0.16268    | -0.4955                          | 0.9044      | 0.04    | 0.53    |
|      | MTBE        | 3            | 0.0412 | 0.01590        | 0.00918    | 0.0017                           | 0.0807      | 0.03    | 0.06    |
|      | One-step-1  | 3            | 0.0339 | 0.00196        | 0.00113    | 0.0290                           | 0.0387      | 0.03    | 0.04    |
|      | One-step-2  | 3            | 0.0726 | 0.05152        | 0.02974    | -0.0554                          | 0.2006      | 0.02    | 0.11    |
|      | One-step-3  | 3            | 0.0265 | 0.02071        | 0.01196    | -0.0249                          | 0.0780      | 0.01    | 0.05    |
|      | Two-step-1  | 3            | 0.0326 | 0.00635        | 0.00367    | 0.0168                           | 0.0483      | 0.03    | 0.04    |
|      | Two- step-2 | 3            | 0.0441 | 0.02219        | 0.01281    | -0.0110                          | 0.0992      | 0.02    | 0.06    |
|      | Two-step-3  | 3            | 0.0304 | 0.03892        | 0.02247    | -0.0663                          | 0.1271      | 0.00    | 0.08    |
|      | Total       | 30           | 0.0579 | 0.09229        | 0.01685    | 0.0234                           | 0.0923      | 0.00    | 0.53    |
| LCA  | MeOH        | 3            | 0.0689 | 0.00661        | 0.00382    | 0.0525                           | 0.0853      | 0.06    | 0.08    |
|      | ACN         | 3            | 0.0559 | 0.03921        | 0.02264    | -0.0415                          | 0.1533      | 0.02    | 0.10    |
|      | IPA         | 3            | 0.2172 | 0.30257        | 0.17469    | -0.5345                          | 0.9688      | 0.03    | 0.57    |
|      | MTBE        | 3            | 0.1265 | 0.10897        | 0.06291    | -0.1442                          | 0.3971      | 0.04    | 0.25    |
|      | One-step-1  | 3            | 0.1830 | 0.18379        | 0.10611    | -0.2736                          | 0.6395      | 0.02    | 0.38    |

|      |             |    |        |         |         |         |        |      |      |
|------|-------------|----|--------|---------|---------|---------|--------|------|------|
| NDCa | One-step-2  | 3  | 0.1887 | 0.03328 | 0.01921 | 0.1060  | 0.2713 | 0.17 | 0.23 |
|      | One-step-3  | 3  | 0.0847 | 0.06412 | 0.03702 | -0.0746 | 0.2440 | 0.01 | 0.14 |
|      | Two-step-1  | 3  | 0.0804 | 0.03640 | 0.02102 | -0.0101 | 0.1708 | 0.04 | 0.11 |
|      | Two- step-2 | 3  | 0.0815 | 0.02217 | 0.01280 | 0.0264  | 0.1366 | 0.07 | 0.11 |
|      | Two-step-3  | 3  | 0.0616 | 0.02678 | 0.01546 | -0.0049 | 0.1281 | 0.03 | 0.08 |
|      | Total       | 30 | 0.1148 | 0.11597 | 0.02117 | 0.0715  | 0.1581 | 0.01 | 0.57 |
|      | MeOH        | 3  | 2.6811 | 0.45322 | 0.26167 | 1.5553  | 3.8070 | 2.33 | 3.19 |
|      | ACN         | 3  | 0.0327 | 0.01403 | 0.00810 | -0.0022 | 0.0675 | 0.02 | 0.05 |
|      | IPA         | 3  | 0.0792 | 0.01494 | 0.00862 | 0.0421  | 0.1163 | 0.06 | 0.09 |
|      | MTBE        | 3  | 0.0698 | 0.04279 | 0.02470 | -0.0364 | 0.1761 | 0.03 | 0.12 |
|      | One-step-1  | 3  | 3.6446 | 0.42756 | 0.24685 | 2.5825  | 4.7067 | 3.29 | 4.12 |
|      | One-step-2  | 3  | 3.3522 | 0.56960 | 0.32886 | 1.9373  | 4.7672 | 2.69 | 3.69 |
|      | One-step-3  | 3  | 3.1812 | 0.37154 | 0.21451 | 2.2582  | 4.1041 | 2.89 | 3.60 |
| ACA  | Two-step-1  | 3  | 4.3673 | 0.54305 | 0.31353 | 3.0182  | 5.7163 | 3.74 | 4.74 |
|      | Two- step-2 | 3  | 3.5782 | 0.20399 | 0.11777 | 3.0714  | 4.0849 | 3.35 | 3.73 |
|      | Two-step-3  | 3  | 3.4605 | 0.64271 | 0.37107 | 1.8639  | 5.0571 | 2.85 | 4.13 |
|      | Total       | 30 | 2.4447 | 1.67114 | 0.30511 | 1.8207  | 3.0687 | 0.02 | 4.74 |
|      | MeOH        | 3  | 1.5889 | 0.24955 | 0.14408 | 0.9690  | 2.2088 | 1.36 | 1.85 |
|      | ACN         | 3  | 0.0468 | 0.02239 | 0.01293 | -0.0088 | 0.1024 | 0.03 | 0.07 |
|      | IPA         | 3  | 0.0535 | 0.02322 | 0.01341 | -0.0042 | 0.1112 | 0.03 | 0.08 |
|      | MTBE        | 3  | 0.0283 | 0.02834 | 0.01636 | -0.0421 | 0.0987 | 0.01 | 0.06 |
|      | One-step-1  | 3  | 2.1787 | 0.30429 | 0.17568 | 1.4228  | 2.9346 | 1.96 | 2.53 |
|      | One-step-2  | 3  | 2.0278 | 0.39615 | 0.22872 | 1.0437  | 3.0119 | 1.61 | 2.39 |
|      | One-step-3  | 3  | 1.8822 | 0.29527 | 0.17047 | 1.1488  | 2.6157 | 1.64 | 2.21 |

|      |             |    |        |         |         |         |        |      |      |
|------|-------------|----|--------|---------|---------|---------|--------|------|------|
| IDCA | Two-step-1  | 3  | 2.5459 | 0.33893 | 0.19568 | 1.7040  | 3.3879 | 2.16 | 2.78 |
|      | Two- step-2 | 3  | 2.2968 | 0.16387 | 0.09461 | 1.8897  | 2.7039 | 2.12 | 2.44 |
|      | Two-step-3  | 3  | 2.1287 | 0.30838 | 0.17804 | 1.3627  | 2.8948 | 1.83 | 2.45 |
|      | Total       | 30 | 1.4778 | 1.00725 | 0.18390 | 1.1017  | 1.8539 | 0.01 | 2.78 |
|      | MeOH        | 3  | 0.9477 | 0.20417 | 0.11788 | 0.4405  | 1.4549 | 0.73 | 1.13 |
|      | ACN         | 3  | 0.0200 | 0.00102 | 0.00059 | 0.0175  | 0.0226 | 0.02 | 0.02 |
|      | IPA         | 3  | 0.0429 | 0.02403 | 0.01387 | -0.0168 | 0.1025 | 0.02 | 0.07 |
|      | MTBE        | 3  | 0.0360 | 0.02520 | 0.01455 | -0.0266 | 0.0986 | 0.02 | 0.07 |
|      | One-step-1  | 3  | 1.1606 | 0.12051 | 0.06958 | 0.8612  | 1.4599 | 1.02 | 1.25 |
|      | One-step-2  | 3  | 1.1356 | 0.25652 | 0.14810 | 0.4984  | 1.7729 | 0.88 | 1.39 |
|      | One-step-3  | 3  | 1.0520 | 0.17149 | 0.09901 | 0.6260  | 1.4780 | 0.88 | 1.22 |
|      | Two-step-1  | 3  | 1.5828 | 0.19404 | 0.11203 | 1.1008  | 2.0648 | 1.41 | 1.79 |
|      | Two- step-2 | 3  | 1.2472 | 0.03662 | 0.02114 | 1.1562  | 1.3382 | 1.21 | 1.28 |
|      | Two-step-3  | 3  | 1.1631 | 0.18513 | 0.10689 | 0.7032  | 1.6230 | 1.03 | 1.37 |
| UDCA | Total       | 30 | 0.8388 | 0.57297 | 0.10461 | 0.6248  | 1.0527 | 0.02 | 1.79 |
|      | MeOH        | 3  | 0.2814 | 0.04309 | 0.02488 | 0.1743  | 0.3884 | 0.25 | 0.33 |
|      | ACN         | 3  | 0.0138 | 0.00727 | 0.00420 | -0.0043 | 0.0318 | 0.01 | 0.02 |
|      | IPA         | 3  | 0.0062 | 0.00354 | 0.00205 | -0.0026 | 0.0150 | 0.00 | 0.01 |
|      | MTBE        | 3  | 0.0130 | 0.01133 | 0.00654 | -0.0152 | 0.0411 | 0.00 | 0.03 |
|      | One-step-1  | 3  | 0.3854 | 0.07685 | 0.04437 | 0.1945  | 0.5763 | 0.32 | 0.47 |
|      | One-step-2  | 3  | 0.3727 | 0.06008 | 0.03469 | 0.2234  | 0.5220 | 0.30 | 0.42 |
|      | One-step-3  | 3  | 0.3139 | 0.04580 | 0.02644 | 0.2002  | 0.4277 | 0.28 | 0.37 |
|      | Two-step-1  | 3  | 0.4707 | 0.04205 | 0.02428 | 0.3663  | 0.5752 | 0.43 | 0.52 |
|      | Two- step-2 | 3  | 0.4101 | 0.01859 | 0.01073 | 0.3639  | 0.4562 | 0.39 | 0.42 |

|             |             |        |         |         |         |         |        |      |      |
|-------------|-------------|--------|---------|---------|---------|---------|--------|------|------|
| HDCA        | Two-step-3  | 3      | 0.3526  | 0.07400 | 0.04272 | 0.1688  | 0.5364 | 0.28 | 0.42 |
|             | Total       | 30     | 0.2620  | 0.17835 | 0.03256 | 0.1954  | 0.3286 | 0.00 | 0.52 |
|             | MeOH        | 3      | 0.1182  | 0.01358 | 0.00784 | 0.0845  | 0.1520 | 0.11 | 0.13 |
|             | ACN         | 3      | 0.0091  | 0.00463 | 0.00267 | -0.0024 | 0.0206 | 0.01 | 0.01 |
|             | IPA         | 3      | 0.0056  | 0.00136 | 0.00079 | 0.0022  | 0.0089 | 0.00 | 0.01 |
|             | MTBE        | 3      | 0.0093  | 0.00297 | 0.00171 | 0.0019  | 0.0166 | 0.01 | 0.01 |
|             | One-step-1  | 3      | 0.1409  | 0.01420 | 0.00820 | 0.1056  | 0.1762 | 0.13 | 0.16 |
|             | One-step-2  | 3      | 0.1559  | 0.02890 | 0.01669 | 0.0841  | 0.2277 | 0.14 | 0.19 |
|             | One-step-3  | 3      | 0.1270  | 0.04292 | 0.02478 | 0.0204  | 0.2337 | 0.10 | 0.18 |
|             | Two-step-1  | 3      | 0.2451  | 0.01363 | 0.00787 | 0.2112  | 0.2789 | 0.23 | 0.25 |
| CDCA        | Two- step-2 | 3      | 0.1618  | 0.01536 | 0.00887 | 0.1236  | 0.1999 | 0.15 | 0.18 |
|             | Two-step-3  | 3      | 0.1372  | 0.04880 | 0.02818 | 0.0160  | 0.2584 | 0.11 | 0.19 |
|             | Total       | 30     | 0.1110  | 0.07894 | 0.01441 | 0.0815  | 0.1405 | 0.00 | 0.25 |
|             | MeOH        | 3      | 0.1831  | 0.06218 | 0.03590 | 0.0286  | 0.3375 | 0.11 | 0.22 |
|             | ACN         | 3      | 0.0064  | 0.00142 | 0.00082 | 0.0029  | 0.0100 | 0.01 | 0.01 |
|             | IPA         | 3      | 0.0470  | 0.03429 | 0.01980 | -0.0381 | 0.1322 | 0.02 | 0.09 |
|             | MTBE        | 3      | 0.0204  | 0.01955 | 0.01129 | -0.0281 | 0.0690 | 0.01 | 0.04 |
|             | One-step-1  | 3      | 0.1786  | 0.04562 | 0.02634 | 0.0653  | 0.2919 | 0.14 | 0.23 |
|             | One-step-2  | 3      | 0.1506  | 0.03378 | 0.01950 | 0.0667  | 0.2345 | 0.13 | 0.19 |
|             | One-step-3  | 3      | 1.1885  | 1.83895 | 1.06172 | -3.3797 | 5.7567 | 0.11 | 3.31 |
| Two-step-1  | 3           | 0.2374 | 0.01888 | 0.01090 | 0.1905  | 0.2843  | 0.22   | 0.25 |      |
| Two- step-2 | 3           | 0.1692 | 0.01314 | 0.00758 | 0.1366  | 0.2018  | 0.15   | 0.18 |      |
| Two-step-3  | 3           | 0.1531 | 0.03991 | 0.02304 | 0.0540  | 0.2523  | 0.11   | 0.19 |      |
| Total       | 30          | 0.2334 | 0.58679 | 0.10713 | 0.0143  | 0.4525  | 0.01   | 3.31 |      |

|              |             |    |        |         |         |         |        |      |      |
|--------------|-------------|----|--------|---------|---------|---------|--------|------|------|
| $\omega$ -MA | MeOH        | 3  | 0.2194 | 0.00879 | 0.00507 | 0.1975  | 0.2412 | 0.21 | 0.22 |
|              | ACN         | 3  | 0.0062 | 0.00400 | 0.00231 | -0.0038 | 0.0161 | 0.00 | 0.01 |
|              | IPA         | 3  | 0.0044 | 0.00138 | 0.00080 | 0.0010  | 0.0078 | 0.00 | 0.01 |
|              | MTBE        | 3  | 0.0037 | 0.00206 | 0.00119 | -0.0015 | 0.0088 | 0.00 | 0.01 |
|              | One-step-1  | 3  | 0.2563 | 0.02889 | 0.01668 | 0.1845  | 0.3280 | 0.23 | 0.29 |
|              | One-step-2  | 3  | 0.2273 | 0.01348 | 0.00778 | 0.1938  | 0.2608 | 0.21 | 0.24 |
|              | One-step-3  | 3  | 0.2586 | 0.05341 | 0.03084 | 0.1259  | 0.3913 | 0.20 | 0.30 |
|              | Two-step-1  | 3  | 0.3155 | 0.01046 | 0.00604 | 0.2895  | 0.3415 | 0.31 | 0.33 |
|              | Two- step-2 | 3  | 0.2497 | 0.02530 | 0.01461 | 0.1869  | 0.3126 | 0.23 | 0.28 |
|              | Two-step-3  | 3  | 0.2873 | 0.02922 | 0.01687 | 0.2147  | 0.3599 | 0.25 | 0.31 |
|              | Total       | 30 | 0.1828 | 0.12302 | 0.02246 | 0.1369  | 0.2288 | 0.00 | 0.33 |
| $\alpha$ -MA | MeOH        | 3  | 0.1993 | 0.06441 | 0.03718 | 0.0393  | 0.3593 | 0.13 | 0.26 |
|              | ACN         | 3  | 0.0062 | 0.00455 | 0.00263 | -0.0051 | 0.0175 | 0.00 | 0.01 |
|              | IPA         | 3  | 0.0054 | 0.00243 | 0.00140 | -0.0006 | 0.0115 | 0.00 | 0.01 |
|              | MTBE        | 3  | 0.0021 | 0.00117 | 0.00067 | -0.0008 | 0.0050 | 0.00 | 0.00 |
|              | One-step-1  | 3  | 0.3027 | 0.06319 | 0.03648 | 0.1457  | 0.4597 | 0.26 | 0.37 |
|              | One-step-2  | 3  | 0.2733 | 0.04023 | 0.02323 | 0.1733  | 0.3732 | 0.25 | 0.32 |
|              | One-step-3  | 3  | 0.2000 | 0.01811 | 0.01046 | 0.1550  | 0.2450 | 0.18 | 0.21 |
|              | Two-step-1  | 3  | 0.3305 | 0.01427 | 0.00824 | 0.2950  | 0.3659 | 0.32 | 0.35 |
|              | Two- step-2 | 3  | 0.2782 | 0.01652 | 0.00954 | 0.2371  | 0.3192 | 0.26 | 0.29 |
|              | Two-step-3  | 3  | 0.3020 | 0.02709 | 0.01564 | 0.2347  | 0.3693 | 0.27 | 0.32 |
|              | Total       | 30 | 0.1900 | 0.13284 | 0.02425 | 0.1404  | 0.2396 | 0.00 | 0.37 |
| $\beta$ -MA  | MeOH        | 3  | 0.2804 | 0.06382 | 0.03684 | 0.1219  | 0.4390 | 0.23 | 0.35 |
|              | ACN         | 3  | 0.0113 | 0.00463 | 0.00267 | -0.0002 | 0.0228 | 0.01 | 0.01 |



|     |             |    |        |         |         |         |        |      |      |
|-----|-------------|----|--------|---------|---------|---------|--------|------|------|
|     | IPA         | 3  | 0.0148 | 0.01668 | 0.00963 | -0.0267 | 0.0562 | 0.00 | 0.03 |
|     | MTBE        | 3  | 0.0041 | 0.00084 | 0.00048 | 0.0020  | 0.0062 | 0.00 | 0.00 |
|     | One-step-1  | 3  | 0.4093 | 0.05021 | 0.02899 | 0.2846  | 0.5341 | 0.37 | 0.47 |
|     | One-step-2  | 3  | 0.3723 | 0.06204 | 0.03582 | 0.2182  | 0.5265 | 0.34 | 0.44 |
|     | One-step-3  | 3  | 0.3728 | 0.05032 | 0.02905 | 0.2478  | 0.4979 | 0.31 | 0.40 |
|     | Two-step-1  | 3  | 0.4749 | 0.00541 | 0.00312 | 0.4615  | 0.4884 | 0.47 | 0.48 |
|     | Two- step-2 | 3  | 0.3943 | 0.03891 | 0.02246 | 0.2976  | 0.4909 | 0.36 | 0.44 |
|     | Two-step-3  | 3  | 0.4268 | 0.03828 | 0.02210 | 0.3317  | 0.5219 | 0.38 | 0.45 |
|     | Total       | 30 | 0.2761 | 0.18640 | 0.03403 | 0.2065  | 0.3457 | 0.00 | 0.48 |
| HCA | MeOH        | 3  | 1.5966 | 0.18934 | 0.10931 | 1.1263  | 2.0670 | 1.40 | 1.78 |
|     | ACN         | 3  | 0.0124 | 0.00185 | 0.00107 | 0.0078  | 0.0170 | 0.01 | 0.01 |
|     | IPA         | 3  | 0.0344 | 0.01073 | 0.00619 | 0.0078  | 0.0611 | 0.03 | 0.05 |
|     | MTBE        | 3  | 0.0108 | 0.00409 | 0.00236 | 0.0006  | 0.0209 | 0.01 | 0.02 |
|     | One-step-1  | 3  | 2.0990 | 0.25752 | 0.14868 | 1.4593  | 2.7387 | 1.86 | 2.37 |
|     | One-step-2  | 3  | 2.1396 | 0.35473 | 0.20481 | 1.2584  | 3.0208 | 1.76 | 2.46 |
|     | One-step-3  | 3  | 1.8956 | 0.26051 | 0.15040 | 1.2484  | 2.5427 | 1.71 | 2.19 |
|     | Two-step-1  | 3  | 2.6328 | 0.08105 | 0.04679 | 2.4315  | 2.8342 | 2.55 | 2.71 |
|     | Two- step-2 | 3  | 2.1325 | 0.03954 | 0.02283 | 2.0342  | 2.2307 | 2.10 | 2.18 |
|     | Two-step-3  | 3  | 2.1832 | 0.08888 | 0.05132 | 1.9624  | 2.4040 | 2.08 | 2.25 |
|     | Total       | 30 | 1.4737 | 1.01014 | 0.18443 | 1.0965  | 1.8509 | 0.01 | 2.71 |
| CA  | MeOH        | 3  | 2.4531 | 0.35742 | 0.20635 | 1.5652  | 3.3409 | 2.20 | 2.86 |
|     | ACN         | 3  | 0.0327 | 0.01348 | 0.00778 | -0.0008 | 0.0661 | 0.02 | 0.05 |
|     | IPA         | 3  | 0.0530 | 0.00957 | 0.00553 | 0.0292  | 0.0767 | 0.04 | 0.06 |
|     | MTBE        | 3  | 0.0102 | 0.00428 | 0.00247 | -0.0004 | 0.0209 | 0.01 | 0.02 |

|         |             |    |        |         |         |         |        |      |      |
|---------|-------------|----|--------|---------|---------|---------|--------|------|------|
|         | One-step-1  | 3  | 3.3915 | 0.60485 | 0.34921 | 1.8890  | 4.8940 | 3.03 | 4.09 |
|         | One-step-2  | 3  | 3.0515 | 0.48112 | 0.27778 | 1.8563  | 4.2467 | 2.50 | 3.37 |
|         | One-step-3  | 3  | 2.9270 | 0.38650 | 0.22314 | 1.9669  | 3.8871 | 2.57 | 3.34 |
|         | Two-step-1  | 3  | 4.1404 | 0.38369 | 0.22152 | 3.1872  | 5.0935 | 3.91 | 4.58 |
|         | Two- step-2 | 3  | 3.3590 | 0.28955 | 0.16717 | 2.6397  | 4.0783 | 3.10 | 3.67 |
|         | Two-step-3  | 3  | 3.5961 | 0.62411 | 0.36033 | 2.0457  | 5.1465 | 2.97 | 4.22 |
|         | Total       | 30 | 2.3014 | 1.60143 | 0.29238 | 1.7035  | 2.8994 | 0.01 | 4.58 |
| DLCA    | MeOH        | 3  | 0.0697 | 0.02581 | 0.01490 | 0.0056  | 0.1339 | 0.04 | 0.10 |
|         | ACN         | 3  | 0.0441 | 0.02806 | 0.01620 | -0.0257 | 0.1138 | 0.01 | 0.07 |
|         | IPA         | 3  | 0.0560 | 0.04234 | 0.02444 | -0.0492 | 0.1611 | 0.01 | 0.10 |
|         | MTBE        | 3  | 0.0936 | 0.09789 | 0.05652 | -0.1495 | 0.3368 | 0.04 | 0.21 |
|         | One-step-1  | 3  | 0.0995 | 0.06634 | 0.03830 | -0.0653 | 0.2643 | 0.06 | 0.18 |
|         | One-step-2  | 3  | 0.0885 | 0.04475 | 0.02584 | -0.0227 | 0.1996 | 0.05 | 0.13 |
|         | One-step-3  | 3  | 0.0475 | 0.03112 | 0.01797 | -0.0298 | 0.1248 | 0.02 | 0.08 |
|         | Two-step-1  | 3  | 0.1049 | 0.02295 | 0.01325 | 0.0479  | 0.1619 | 0.08 | 0.13 |
|         | Two- step-2 | 3  | 0.0525 | 0.02526 | 0.01458 | -0.0102 | 0.1153 | 0.03 | 0.08 |
|         | Two-step-3  | 3  | 0.0457 | 0.06156 | 0.03554 | -0.1072 | 0.1986 | 0.01 | 0.12 |
|         | Total       | 30 | 0.0702 | 0.04774 | 0.00872 | 0.0524  | 0.0880 | 0.01 | 0.21 |
| β-DCDCA | MeOH        | 3  | 0.7403 | 0.06418 | 0.03706 | 0.5809  | 0.8997 | 0.69 | 0.81 |
|         | ACN         | 3  | 0.0302 | 0.03568 | 0.02060 | -0.0584 | 0.1189 | 0.01 | 0.07 |
|         | IPA         | 3  | 0.0098 | 0.00557 | 0.00322 | -0.0041 | 0.0236 | 0.01 | 0.02 |
|         | MTBE        | 3  | 0.0284 | 0.01428 | 0.00824 | -0.0071 | 0.0638 | 0.01 | 0.04 |
|         | One-step-1  | 3  | 0.8717 | 0.15417 | 0.08901 | 0.4887  | 1.2547 | 0.77 | 1.05 |
|         | One-step-2  | 3  | 0.8009 | 0.14912 | 0.08609 | 0.4305  | 1.1714 | 0.66 | 0.96 |

|             |             |        |         |         |         |         |        |      |      |
|-------------|-------------|--------|---------|---------|---------|---------|--------|------|------|
| DCDCA       | One-step-3  | 3      | 0.2714  | 0.38067 | 0.21978 | -0.6743 | 1.2170 | 0.04 | 0.71 |
|             | Two-step-1  | 3      | 1.2304  | 0.10376 | 0.05991 | 0.9726  | 1.4881 | 1.12 | 1.32 |
|             | Two- step-2 | 3      | 1.0827  | 0.03236 | 0.01868 | 1.0024  | 1.1631 | 1.06 | 1.12 |
|             | Two-step-3  | 3      | 0.5634  | 0.45957 | 0.26533 | -0.5782 | 1.7051 | 0.04 | 0.90 |
|             | Total       | 30     | 0.5629  | 0.47044 | 0.08589 | 0.3873  | 0.7386 | 0.01 | 1.32 |
|             | MeOH        | 3      | 0.6265  | 0.13454 | 0.07767 | 0.2923  | 0.9607 | 0.47 | 0.71 |
|             | ACN         | 3      | 0.0415  | 0.03520 | 0.02033 | -0.0460 | 0.1289 | 0.01 | 0.08 |
|             | IPA         | 3      | 0.0199  | 0.00905 | 0.00523 | -0.0026 | 0.0424 | 0.01 | 0.03 |
|             | MTBE        | 3      | 0.0454  | 0.02003 | 0.01156 | -0.0044 | 0.0951 | 0.03 | 0.07 |
|             | One-step-1  | 3      | 0.8803  | 0.14579 | 0.08417 | 0.5181  | 1.2424 | 0.79 | 1.05 |
| One-step-2  | 3           | 0.7835 | 0.17437 | 0.10067 | 0.3504  | 1.2167  | 0.61   | 0.96 |      |
| One-step-3  | 3           | 0.7268 | 0.04396 | 0.02538 | 0.6176  | 0.8360  | 0.69   | 0.78 |      |
| Two-step-1  | 3           | 1.2651 | 0.05023 | 0.02900 | 1.1403  | 1.3899  | 1.23   | 1.32 |      |
| Two- step-2 | 3           | 1.0645 | 0.02356 | 0.01360 | 1.0060  | 1.1230  | 1.05   | 1.09 |      |
| Two-step-3  | 3           | 0.8366 | 0.08727 | 0.05039 | 0.6198  | 1.0534  | 0.75   | 0.93 |      |
| Total       | 30          | 0.6290 | 0.43710 | 0.07980 | 0.4658  | 0.7922  | 0.01   | 1.32 |      |
| AlloCA      | MeOH        | 3      | 0.2798  | 0.05220 | 0.03014 | 0.1501  | 0.4095 | 0.23 | 0.33 |
|             | ACN         | 3      | 0.0502  | 0.01637 | 0.00945 | 0.0095  | 0.0908 | 0.03 | 0.07 |
|             | IPA         | 3      | 0.0476  | 0.01954 | 0.01128 | -0.0010 | 0.0961 | 0.03 | 0.07 |
|             | MTBE        | 3      | 0.0677  | 0.01740 | 0.01005 | 0.0245  | 0.1110 | 0.06 | 0.09 |
|             | One-step-1  | 3      | 0.3400  | 0.06614 | 0.03819 | 0.1757  | 0.5043 | 0.30 | 0.42 |
|             | One-step-2  | 3      | 0.2985  | 0.03218 | 0.01858 | 0.2186  | 0.3784 | 0.28 | 0.34 |
|             | One-step-3  | 3      | 0.3721  | 0.06884 | 0.03975 | 0.2011  | 0.5431 | 0.32 | 0.45 |
|             | Two-step-1  | 3      | 0.4395  | 0.04528 | 0.02614 | 0.3270  | 0.5520 | 0.39 | 0.48 |

|               |             |        |         |         |         |         |        |      |      |
|---------------|-------------|--------|---------|---------|---------|---------|--------|------|------|
| 12k-LCA       | Two- step-2 | 3      | 0.3716  | 0.04104 | 0.02370 | 0.2697  | 0.4736 | 0.33 | 0.40 |
|               | Two-step-3  | 3      | 0.3557  | 0.01907 | 0.01101 | 0.3083  | 0.4031 | 0.33 | 0.37 |
|               | Total       | 30     | 0.2623  | 0.14833 | 0.02708 | 0.2069  | 0.3177 | 0.03 | 0.48 |
|               | MeOH        | 3      | 0.0205  | 0.00431 | 0.00249 | 0.0097  | 0.0312 | 0.02 | 0.02 |
|               | ACN         | 3      | 0.0074  | 0.00321 | 0.00185 | -0.0005 | 0.0154 | 0.00 | 0.01 |
|               | IPA         | 3      | 0.0032  | 0.00133 | 0.00077 | -0.0001 | 0.0065 | 0.00 | 0.00 |
|               | MTBE        | 3      | 0.0110  | 0.01063 | 0.00613 | -0.0154 | 0.0374 | 0.00 | 0.02 |
|               | One-step-1  | 3      | 0.0103  | 0.00541 | 0.00312 | -0.0032 | 0.0237 | 0.01 | 0.02 |
|               | One-step-2  | 3      | 0.0091  | 0.00118 | 0.00068 | 0.0061  | 0.0120 | 0.01 | 0.01 |
|               | One-step-3  | 3      | 0.0235  | 0.00868 | 0.00501 | 0.0019  | 0.0450 | 0.02 | 0.03 |
| 3,7,12-Trione | Two-step-1  | 3      | 0.0207  | 0.00449 | 0.00259 | 0.0095  | 0.0318 | 0.02 | 0.02 |
|               | Two- step-2 | 3      | 0.0125  | 0.00528 | 0.00305 | -0.0006 | 0.0256 | 0.01 | 0.02 |
|               | Two-step-3  | 3      | 0.0147  | 0.00437 | 0.00252 | 0.0038  | 0.0255 | 0.01 | 0.02 |
|               | Total       | 30     | 0.0133  | 0.00783 | 0.00143 | 0.0104  | 0.0162 | 0.00 | 0.03 |
|               | MeOH        | 3      | 0.0216  | 0.01471 | 0.00849 | -0.0149 | 0.0582 | 0.01 | 0.04 |
|               | ACN         | 3      | 0.0121  | 0.00673 | 0.00389 | -0.0046 | 0.0288 | 0.01 | 0.02 |
|               | IPA         | 3      | 0.0051  | 0.00465 | 0.00268 | -0.0065 | 0.0166 | 0.00 | 0.01 |
|               | MTBE        | 3      | 0.0142  | 0.00463 | 0.00267 | 0.0028  | 0.0257 | 0.01 | 0.02 |
|               | One-step-1  | 3      | 0.0436  | 0.02851 | 0.01646 | -0.0272 | 0.1145 | 0.03 | 0.08 |
|               | One-step-2  | 3      | 0.0222  | 0.01075 | 0.00621 | -0.0046 | 0.0489 | 0.01 | 0.03 |
| One-step-3    | 3           | 0.0424 | 0.02560 | 0.01478 | -0.0212 | 0.1060  | 0.02   | 0.07 |      |
| Two-step-1    | 3           | 0.0437 | 0.00885 | 0.00511 | 0.0217  | 0.0657  | 0.03   | 0.05 |      |
| Two- step-2   | 3           | 0.0326 | 0.02552 | 0.01474 | -0.0308 | 0.0960  | 0.01   | 0.06 |      |
| Two-step-3    | 3           | 0.0288 | 0.00569 | 0.00328 | 0.0147  | 0.0430  | 0.02   | 0.03 |      |

|             |              |       |        |         |         |         |        |        |      |
|-------------|--------------|-------|--------|---------|---------|---------|--------|--------|------|
| 7,12 dk-LCA | Total        | 30    | 0.0266 | 0.01906 | 0.00348 | 0.0195  | 0.0338 | 0.00   | 0.08 |
|             | MeOH         | 3     | 0.0220 | 0.01508 | 0.00871 | -0.0155 | 0.0594 | 0.01   | 0.04 |
|             | ACN          | 3     | 0.0101 | 0.00103 | 0.00060 | 0.0076  | 0.0127 | 0.01   | 0.01 |
|             | IPA          | 3     | 0.0101 | 0.00335 | 0.00193 | 0.0018  | 0.0184 | 0.01   | 0.01 |
|             | MTBE         | 3     | 0.0169 | 0.00338 | 0.00195 | 0.0086  | 0.0253 | 0.01   | 0.02 |
|             | One-step-1   | 3     | 0.0466 | 0.05327 | 0.03076 | -0.0858 | 0.1789 | 0.01   | 0.11 |
|             | One-step-2   | 3     | 0.0107 | 0.00503 | 0.00291 | -0.0018 | 0.0232 | 0.01   | 0.02 |
|             | One-step-3   | 3     | 0.0124 | 0.00512 | 0.00296 | -0.0003 | 0.0251 | 0.01   | 0.02 |
|             | Two-step-1   | 3     | 0.0496 | 0.00741 | 0.00428 | 0.0312  | 0.0680 | 0.04   | 0.05 |
|             | Two- step-2  | 3     | 0.0165 | 0.00882 | 0.00509 | -0.0054 | 0.0384 | 0.01   | 0.02 |
|             | Two-step-3   | 3     | 0.0105 | 0.00479 | 0.00277 | -0.0014 | 0.0224 | 0.01   | 0.02 |
|             | Methyl Ester | Total | 30     | 0.0205  | 0.02093 | 0.00382 | 0.0127 | 0.0284 | 0.01 |
| MeOH        |              | 3     | 0.0290 | 0.01480 | 0.00855 | -0.0078 | 0.0658 | 0.01   | 0.04 |
| ACN         |              | 3     | 0.0407 | 0.04252 | 0.02455 | -0.0649 | 0.1464 | 0.01   | 0.09 |
| IPA         |              | 3     | 0.0490 | 0.02470 | 0.01426 | -0.0124 | 0.1103 | 0.02   | 0.06 |
| MTBE        |              | 3     | 0.0302 | 0.01729 | 0.00998 | -0.0127 | 0.0732 | 0.01   | 0.05 |
| One-step-1  |              | 3     | 0.0655 | 0.06518 | 0.03763 | -0.0964 | 0.2274 | 0.03   | 0.14 |
| One-step-2  |              | 3     | 0.0716 | 0.05268 | 0.03042 | -0.0592 | 0.2025 | 0.01   | 0.11 |
| One-step-3  |              | 3     | 0.0607 | 0.04947 | 0.02856 | -0.0622 | 0.1836 | 0.02   | 0.12 |
| Two-step-1  |              | 3     | 0.1131 | 0.02834 | 0.01636 | 0.0427  | 0.1835 | 0.09   | 0.14 |
| Two- step-2 |              | 3     | 0.0763 | 0.03661 | 0.02114 | -0.0146 | 0.1673 | 0.05   | 0.12 |
| Two-step-3  |              | 3     | 0.0819 | 0.07507 | 0.04334 | -0.1046 | 0.2684 | 0.01   | 0.16 |
| GLCA        |              | Total | 30     | 0.0618  | 0.04491 | 0.00820 | 0.0450 | 0.0786 | 0.01 |
|             | MeOH         | 3     | 1.3432 | 0.22122 | 0.12772 | 0.7936  | 1.8927 | 1.20   | 1.60 |

|       |             |    |        |         |         |         |        |      |      |
|-------|-------------|----|--------|---------|---------|---------|--------|------|------|
|       | ACN         | 3  | 0.0039 | 0.00018 | 0.00010 | 0.0034  | 0.0043 | 0.00 | 0.00 |
|       | IPA         | 3  | 0.0232 | 0.01001 | 0.00578 | -0.0017 | 0.0481 | 0.02 | 0.03 |
|       | MTBE        | 3  | 0.0030 | 0.00133 | 0.00077 | -0.0003 | 0.0063 | 0.00 | 0.00 |
|       | One-step-1  | 3  | 2.1150 | 0.21788 | 0.12579 | 1.5738  | 2.6563 | 1.90 | 2.34 |
|       | One-step-2  | 3  | 1.7169 | 0.37504 | 0.21653 | 0.7853  | 2.6486 | 1.29 | 1.98 |
|       | One-step-3  | 3  | 0.7294 | 0.03536 | 0.02042 | 0.6415  | 0.8172 | 0.70 | 0.77 |
|       | Two-step-1  | 3  | 2.6078 | 0.31098 | 0.17954 | 1.8353  | 3.3804 | 2.25 | 2.83 |
|       | Two- step-2 | 3  | 2.0179 | 0.01534 | 0.00886 | 1.9797  | 2.0560 | 2.00 | 2.03 |
|       | Two-step-3  | 3  | 0.8004 | 0.19205 | 0.11088 | 0.3233  | 1.2774 | 0.64 | 1.01 |
|       | Total       | 30 | 1.1361 | 0.94391 | 0.17233 | 0.7836  | 1.4885 | 0.00 | 2.83 |
| GUDCA | MeOH        | 3  | 1.5771 | 0.12742 | 0.07356 | 1.2606  | 1.8937 | 1.50 | 1.72 |
|       | ACN         | 3  | 0.0012 | 0.00030 | 0.00017 | 0.0005  | 0.0020 | 0.00 | 0.00 |
|       | IPA         | 3  | 0.0188 | 0.00366 | 0.00212 | 0.0097  | 0.0279 | 0.02 | 0.02 |
|       | MTBE        | 3  | 0.0004 | 0.00023 | 0.00013 | -0.0002 | 0.0010 | 0.00 | 0.00 |
|       | One-step-1  | 3  | 2.5598 | 0.37693 | 0.21762 | 1.6234  | 3.4961 | 2.24 | 2.98 |
|       | One-step-2  | 3  | 2.3080 | 0.34921 | 0.20162 | 1.4405  | 3.1754 | 1.92 | 2.59 |
|       | One-step-3  | 3  | 1.9648 | 0.25880 | 0.14942 | 1.3219  | 2.6077 | 1.80 | 2.26 |
|       | Two-step-1  | 3  | 2.8669 | 0.08568 | 0.04947 | 2.6541  | 3.0798 | 2.78 | 2.95 |
|       | Two- step-2 | 3  | 2.4235 | 0.12590 | 0.07269 | 2.1108  | 2.7363 | 2.33 | 2.57 |
|       | Two-step-3  | 3  | 2.3352 | 0.35124 | 0.20279 | 1.4626  | 3.2077 | 1.97 | 2.67 |
|       | Total       | 30 | 1.6056 | 1.12909 | 0.20614 | 1.1840  | 2.0272 | 0.00 | 2.98 |
| GCDCA | MeOH        | 3  | 0.9570 | 0.13164 | 0.07600 | 0.6300  | 1.2840 | 0.86 | 1.11 |
|       | ACN         | 3  | 0.0014 | 0.00033 | 0.00019 | 0.0006  | 0.0022 | 0.00 | 0.00 |
|       | IPA         | 3  | 0.0108 | 0.00372 | 0.00215 | 0.0016  | 0.0201 | 0.01 | 0.02 |

|       |             |    |        |         |         |         |        |      |      |
|-------|-------------|----|--------|---------|---------|---------|--------|------|------|
|       | MTBE        | 3  | 0.0004 | 0.00025 | 0.00014 | -0.0002 | 0.0010 | 0.00 | 0.00 |
|       | One-step-1  | 3  | 1.4271 | 0.22922 | 0.13234 | 0.8577  | 1.9965 | 1.29 | 1.69 |
|       | One-step-2  | 3  | 1.2606 | 0.26247 | 0.15154 | 0.6086  | 1.9126 | 0.97 | 1.49 |
|       | One-step-3  | 3  | 0.9955 | 0.09127 | 0.05269 | 0.7688  | 1.2222 | 0.93 | 1.10 |
|       | Two-step-1  | 3  | 1.6703 | 0.11408 | 0.06586 | 1.3869  | 1.9537 | 1.55 | 1.77 |
|       | Two- step-2 | 3  | 1.4312 | 0.11110 | 0.06415 | 1.1552  | 1.7072 | 1.31 | 1.54 |
|       | Two-step-3  | 3  | 1.1492 | 0.22545 | 0.13016 | 0.5891  | 1.7092 | 0.92 | 1.37 |
|       | Total       | 30 | 0.8904 | 0.63626 | 0.11616 | 0.6528  | 1.1279 | 0.00 | 1.77 |
| GDCA  | MeOH        | 3  | 1.2578 | 0.04826 | 0.02787 | 1.1379  | 1.3777 | 1.22 | 1.31 |
|       | ACN         | 3  | 0.0038 | 0.00487 | 0.00281 | -0.0083 | 0.0159 | 0.00 | 0.01 |
|       | IPA         | 3  | 0.0152 | 0.00439 | 0.00253 | 0.0043  | 0.0261 | 0.01 | 0.02 |
|       | MTBE        | 3  | 0.0006 | 0.00024 | 0.00014 | 0.0000  | 0.0012 | 0.00 | 0.00 |
|       | One-step-1  | 3  | 1.7923 | 0.12550 | 0.07246 | 1.4806  | 2.1041 | 1.69 | 1.93 |
|       | One-step-2  | 3  | 1.6864 | 0.21800 | 0.12586 | 1.1449  | 2.2280 | 1.46 | 1.89 |
|       | One-step-3  | 3  | 1.5492 | 0.20058 | 0.11581 | 1.0509  | 2.0474 | 1.38 | 1.77 |
|       | Two-step-1  | 3  | 2.1952 | 0.22234 | 0.12837 | 1.6429  | 2.7475 | 1.94 | 2.37 |
|       | Two- step-2 | 3  | 1.8673 | 0.04201 | 0.02426 | 1.7630  | 1.9717 | 1.82 | 1.90 |
|       | Two-step-3  | 3  | 1.6071 | 0.24728 | 0.14277 | 0.9929  | 2.2214 | 1.34 | 1.82 |
|       | Total       | 30 | 1.1975 | 0.83457 | 0.15237 | 0.8859  | 1.5091 | 0.00 | 2.37 |
| Gβ-MA | MeOH        | 3  | 0.7450 | 0.05960 | 0.03441 | 0.5969  | 0.8930 | 0.68 | 0.79 |
|       | ACN         | 3  | 0.0006 | 0.00019 | 0.00011 | 0.0001  | 0.0010 | 0.00 | 0.00 |
|       | IPA         | 3  | 0.0077 | 0.00238 | 0.00138 | 0.0018  | 0.0136 | 0.01 | 0.01 |
|       | MTBE        | 3  | 0.0002 | 0.00016 | 0.00009 | -0.0002 | 0.0006 | 0.00 | 0.00 |
|       | One-step-1  | 3  | 1.3315 | 0.24687 | 0.14253 | 0.7182  | 1.9447 | 1.16 | 1.61 |

|                       |             |    |        |         |         |         |        |      |      |
|-----------------------|-------------|----|--------|---------|---------|---------|--------|------|------|
|                       | One-step-2  | 3  | 1.1969 | 0.21931 | 0.12662 | 0.6521  | 1.7417 | 0.94 | 1.34 |
|                       | One-step-3  | 3  | 1.1131 | 0.10816 | 0.06245 | 0.8444  | 1.3818 | 1.02 | 1.23 |
|                       | Two-step-1  | 3  | 1.4435 | 0.04873 | 0.02813 | 1.3224  | 1.5645 | 1.39 | 1.48 |
|                       | Two- step-2 | 3  | 1.3380 | 0.00678 | 0.00392 | 1.3212  | 1.3549 | 1.33 | 1.34 |
|                       | Two-step-3  | 3  | 1.1833 | 0.13988 | 0.08076 | 0.8358  | 1.5307 | 1.03 | 1.30 |
|                       | Total       | 30 | 0.8360 | 0.59153 | 0.10800 | 0.6151  | 1.0568 | 0.00 | 1.61 |
| GCA                   | MeOH        | 3  | 0.9346 | 0.04455 | 0.02572 | 0.8239  | 1.0453 | 0.88 | 0.97 |
|                       | ACN         | 3  | 0.0008 | 0.00038 | 0.00022 | -0.0002 | 0.0017 | 0.00 | 0.00 |
|                       | IPA         | 3  | 0.0085 | 0.00101 | 0.00058 | 0.0060  | 0.0110 | 0.01 | 0.01 |
|                       | MTBE        | 3  | 0.0003 | 0.00005 | 0.00003 | 0.0002  | 0.0004 | 0.00 | 0.00 |
|                       | One-step-1  | 3  | 1.5236 | 0.20252 | 0.11692 | 1.0205  | 2.0266 | 1.40 | 1.76 |
|                       | One-step-2  | 3  | 1.4910 | 0.21314 | 0.12306 | 0.9616  | 2.0205 | 1.26 | 1.68 |
|                       | One-step-3  | 3  | 1.3721 | 0.17952 | 0.10365 | 0.9262  | 1.8181 | 1.26 | 1.58 |
|                       | Two-step-1  | 3  | 1.8351 | 0.08190 | 0.04728 | 1.6317  | 2.0386 | 1.76 | 1.92 |
|                       | Two- step-2 | 3  | 1.5655 | 0.09885 | 0.05707 | 1.3200  | 1.8111 | 1.45 | 1.63 |
|                       | Two-step-3  | 3  | 1.4501 | 0.12328 | 0.07118 | 1.1438  | 1.7563 | 1.33 | 1.58 |
|                       | Total       | 30 | 1.0182 | 0.71609 | 0.13074 | 0.7508  | 1.2856 | 0.00 | 1.92 |
| Glyco-3, 7, 12-Trione | MeOH        | 3  | 0.3715 | 0.05620 | 0.03244 | 0.2319  | 0.5111 | 0.31 | 0.42 |
|                       | ACN         | 3  | 0.0013 | 0.00066 | 0.00038 | -0.0003 | 0.0029 | 0.00 | 0.00 |
|                       | IPA         | 3  | 0.0048 | 0.00372 | 0.00215 | -0.0045 | 0.0140 | 0.00 | 0.01 |
|                       | MTBE        | 3  | 0.0003 | 0.00031 | 0.00018 | -0.0005 | 0.0010 | 0.00 | 0.00 |
|                       | One-step-1  | 3  | 0.7592 | 0.13229 | 0.07638 | 0.4306  | 1.0879 | 0.65 | 0.90 |
|                       | One-step-2  | 3  | 0.7116 | 0.05274 | 0.03045 | 0.5806  | 0.8426 | 0.65 | 0.75 |
|                       | One-step-3  | 3  | 0.6344 | 0.04669 | 0.02696 | 0.5184  | 0.7504 | 0.60 | 0.69 |



|      |             |    |        |         |         |         |        |      |      |
|------|-------------|----|--------|---------|---------|---------|--------|------|------|
| TLCA | Two-step-1  | 3  | 0.8532 | 0.03490 | 0.02015 | 0.7665  | 0.9399 | 0.83 | 0.89 |
|      | Two- step-2 | 3  | 0.7821 | 0.04470 | 0.02581 | 0.6711  | 0.8931 | 0.73 | 0.82 |
|      | Two-step-3  | 3  | 0.7637 | 0.11973 | 0.06913 | 0.4662  | 1.0611 | 0.66 | 0.89 |
|      | Total       | 30 | 0.4882 | 0.35108 | 0.06410 | 0.3571  | 0.6193 | 0.00 | 0.90 |
|      | MeOH        | 3  | 0.7482 | 0.12265 | 0.07081 | 0.4435  | 1.0528 | 0.61 | 0.85 |
|      | ACN         | 3  | 0.0050 | 0.00071 | 0.00041 | 0.0032  | 0.0067 | 0.00 | 0.01 |
|      | IPA         | 3  | 0.0152 | 0.00656 | 0.00379 | -0.0011 | 0.0315 | 0.01 | 0.02 |
|      | MTBE        | 3  | 0.0001 | 0.00005 | 0.00003 | -0.0001 | 0.0002 | 0.00 | 0.00 |
|      | One-step-1  | 3  | 0.9677 | 0.10607 | 0.06124 | 0.7042  | 1.2312 | 0.90 | 1.09 |
|      | One-step-2  | 3  | 0.8515 | 0.12565 | 0.07254 | 0.5394  | 1.1636 | 0.71 | 0.96 |
|      | One-step-3  | 3  | 0.3761 | 0.02679 | 0.01547 | 0.3095  | 0.4426 | 0.35 | 0.40 |
|      | Two-step-1  | 3  | 1.2031 | 0.04296 | 0.02480 | 1.0963  | 1.3098 | 1.17 | 1.25 |
|      | Two- step-2 | 3  | 0.8886 | 0.02234 | 0.01290 | 0.8331  | 0.9441 | 0.87 | 0.91 |
|      | Two-step-3  | 3  | 0.3909 | 0.08718 | 0.05034 | 0.1743  | 0.6075 | 0.32 | 0.49 |
| TDCA | Total       | 30 | 0.5446 | 0.43411 | 0.07926 | 0.3825  | 0.7067 | 0.00 | 1.25 |
|      | MeOH        | 3  | 1.3780 | 0.08257 | 0.04767 | 1.1728  | 1.5831 | 1.32 | 1.47 |
|      | ACN         | 3  | 0.0063 | 0.00087 | 0.00050 | 0.0041  | 0.0084 | 0.01 | 0.01 |
|      | IPA         | 3  | 0.0214 | 0.00529 | 0.00305 | 0.0082  | 0.0345 | 0.02 | 0.03 |
|      | MTBE        | 3  | 0.0002 | 0.00005 | 0.00003 | 0.0001  | 0.0003 | 0.00 | 0.00 |
|      | One-step-1  | 3  | 2.3384 | 0.35258 | 0.20356 | 1.4625  | 3.2143 | 2.12 | 2.74 |
|      | One-step-2  | 3  | 2.1958 | 0.25876 | 0.14939 | 1.5530  | 2.8386 | 1.91 | 2.40 |
|      | One-step-3  | 3  | 1.5445 | 0.32527 | 0.18779 | 0.7365  | 2.3525 | 1.25 | 1.90 |
|      | Two-step-1  | 3  | 2.5700 | 0.16338 | 0.09432 | 2.1642  | 2.9759 | 2.43 | 2.75 |
|      | Two- step-2 | 3  | 2.2490 | 0.10407 | 0.06009 | 1.9905  | 2.5076 | 2.15 | 2.35 |

|             |             |        |         |         |         |         |        |      |      |
|-------------|-------------|--------|---------|---------|---------|---------|--------|------|------|
| TUDCA       | Two-step-3  | 3      | 1.7506  | 0.26964 | 0.15568 | 1.0808  | 2.4205 | 1.53 | 2.05 |
|             | Total       | 30     | 1.4054  | 1.00823 | 0.18408 | 1.0289  | 1.7819 | 0.00 | 2.75 |
|             | MeOH        | 3      | 1.1800  | 0.18183 | 0.10498 | 0.7283  | 1.6317 | 1.03 | 1.38 |
|             | ACN         | 3      | 0.0047  | 0.00018 | 0.00011 | 0.0042  | 0.0051 | 0.00 | 0.00 |
|             | IPA         | 3      | 0.0185  | 0.00361 | 0.00209 | 0.0095  | 0.0275 | 0.02 | 0.02 |
|             | MTBE        | 3      | 0.0003  | 0.00032 | 0.00019 | -0.0005 | 0.0011 | 0.00 | 0.00 |
|             | One-step-1  | 3      | 1.9188  | 0.12500 | 0.07217 | 1.6082  | 2.2293 | 1.83 | 2.06 |
|             | One-step-2  | 3      | 1.8989  | 0.23970 | 0.13839 | 1.3035  | 2.4944 | 1.63 | 2.08 |
|             | One-step-3  | 3      | 1.5130  | 0.21040 | 0.12148 | 0.9904  | 2.0357 | 1.37 | 1.75 |
|             | Two-step-1  | 3      | 2.1873  | 0.06565 | 0.03790 | 2.0242  | 2.3504 | 2.14 | 2.26 |
| TCDCA       | Two- step-2 | 3      | 1.9377  | 0.03002 | 0.01733 | 1.8631  | 2.0122 | 1.91 | 1.97 |
|             | Two-step-3  | 3      | 1.6842  | 0.30208 | 0.17440 | 0.9338  | 2.4346 | 1.41 | 2.01 |
|             | Total       | 30     | 1.2343  | 0.86743 | 0.15837 | 0.9104  | 1.5582 | 0.00 | 2.26 |
|             | MeOH        | 3      | 1.3747  | 0.10700 | 0.06178 | 1.1089  | 1.6405 | 1.30 | 1.50 |
|             | ACN         | 3      | 0.0049  | 0.00049 | 0.00028 | 0.0037  | 0.0062 | 0.00 | 0.01 |
|             | IPA         | 3      | 0.0193  | 0.00405 | 0.00234 | 0.0092  | 0.0293 | 0.02 | 0.02 |
|             | MTBE        | 3      | 0.0005  | 0.00035 | 0.00020 | -0.0004 | 0.0013 | 0.00 | 0.00 |
|             | One-step-1  | 3      | 1.8300  | 0.24075 | 0.13900 | 1.2320  | 2.4281 | 1.67 | 2.11 |
|             | One-step-2  | 3      | 1.8222  | 0.28259 | 0.16315 | 1.1202  | 2.5242 | 1.52 | 2.08 |
|             | One-step-3  | 3      | 1.4644  | 0.15531 | 0.08967 | 1.0786  | 1.8503 | 1.32 | 1.63 |
| Two-step-1  | 3           | 2.2020 | 0.13735 | 0.07930 | 1.8608  | 2.5432  | 2.06   | 2.34 |      |
| Two- step-2 | 3           | 1.8841 | 0.06394 | 0.03692 | 1.7252  | 2.0429  | 1.81   | 1.93 |      |
| Two-step-3  | 3           | 1.5850 | 0.31290 | 0.18065 | 0.8077  | 2.3623  | 1.33   | 1.94 |      |
| Total       | 30          | 1.2187 | 0.84844 | 0.15490 | 0.9019  | 1.5355  | 0.00   | 2.34 |      |

|       |             |    |        |         |         |         |        |      |      |
|-------|-------------|----|--------|---------|---------|---------|--------|------|------|
| Tβ-MA | MeOH        | 3  | 0.3798 | 0.06974 | 0.04026 | 0.2066  | 0.5531 | 0.33 | 0.46 |
|       | ACN         | 3  | 0.0011 | 0.00066 | 0.00038 | -0.0006 | 0.0027 | 0.00 | 0.00 |
|       | IPA         | 3  | 0.0062 | 0.00065 | 0.00038 | 0.0046  | 0.0078 | 0.01 | 0.01 |
|       | MTBE        | 3  | 0.0001 | 0.00005 | 0.00003 | 0.0000  | 0.0002 | 0.00 | 0.00 |
|       | One-step-1  | 3  | 0.6013 | 0.00295 | 0.00170 | 0.5939  | 0.6086 | 0.60 | 0.60 |
|       | One-step-2  | 3  | 0.5926 | 0.11113 | 0.06416 | 0.3165  | 0.8686 | 0.47 | 0.68 |
|       | One-step-3  | 3  | 0.5050 | 0.05865 | 0.03386 | 0.3594  | 0.6507 | 0.45 | 0.57 |
|       | Two-step-1  | 3  | 0.7416 | 0.02142 | 0.01236 | 0.6884  | 0.7948 | 0.73 | 0.77 |
|       | Two- step-2 | 3  | 0.6582 | 0.01458 | 0.00842 | 0.6220  | 0.6945 | 0.65 | 0.67 |
|       | Two-step-3  | 3  | 0.6043 | 0.10530 | 0.06080 | 0.3428  | 0.8659 | 0.53 | 0.73 |
|       | Total       | 30 | 0.4090 | 0.28931 | 0.05282 | 0.3010  | 0.5171 | 0.00 | 0.77 |
| THCA  | MeOH        | 3  | 0.3173 | 0.03722 | 0.02149 | 0.2249  | 0.4098 | 0.28 | 0.35 |
|       | ACN         | 3  | 0.0014 | 0.00115 | 0.00067 | -0.0015 | 0.0042 | 0.00 | 0.00 |
|       | IPA         | 3  | 0.0053 | 0.00053 | 0.00031 | 0.0040  | 0.0067 | 0.00 | 0.01 |
|       | MTBE        | 3  | 0.0014 | 0.00133 | 0.00077 | -0.0019 | 0.0047 | 0.00 | 0.00 |
|       | One-step-1  | 3  | 0.6181 | 0.11062 | 0.06386 | 0.3434  | 0.8929 | 0.53 | 0.74 |
|       | One-step-2  | 3  | 0.5778 | 0.06128 | 0.03538 | 0.4255  | 0.7300 | 0.51 | 0.63 |
|       | One-step-3  | 3  | 0.4605 | 0.07681 | 0.04435 | 0.2697  | 0.6514 | 0.42 | 0.55 |
|       | Two-step-1  | 3  | 0.6601 | 0.00264 | 0.00153 | 0.6535  | 0.6667 | 0.66 | 0.66 |
|       | Two- step-2 | 3  | 0.5826 | 0.05743 | 0.03316 | 0.4399  | 0.7253 | 0.54 | 0.65 |
|       | Two-step-3  | 3  | 0.5398 | 0.05263 | 0.03039 | 0.4091  | 0.6705 | 0.48 | 0.58 |
|       | Total       | 30 | 0.3764 | 0.26868 | 0.04905 | 0.2761  | 0.4768 | 0.00 | 0.74 |
| TCA   | MeOH        | 3  | 0.1396 | 0.01672 | 0.00965 | 0.0981  | 0.1811 | 0.13 | 0.16 |
|       | ACN         | 3  | 0.0004 | 0.00027 | 0.00015 | -0.0003 | 0.0010 | 0.00 | 0.00 |

|             |             |       |        |         |         |        |        |      |      |
|-------------|-------------|-------|--------|---------|---------|--------|--------|------|------|
|             | IPA         | 3     | 0.0017 | 0.00045 | 0.00026 | 0.0006 | 0.0028 | 0.00 | 0.00 |
|             | MTBE        | 3     | 0.0001 | 0.00004 | 0.00002 | 0.0000 | 0.0002 | 0.00 | 0.00 |
|             | One-step-1  | 3     | 0.2448 | 0.01922 | 0.01110 | 0.1971 | 0.2926 | 0.23 | 0.26 |
|             | One-step-2  | 3     | 0.2561 | 0.03804 | 0.02196 | 0.1617 | 0.3506 | 0.21 | 0.28 |
|             | One-step-3  | 3     | 0.2217 | 0.04065 | 0.02347 | 0.1207 | 0.3227 | 0.18 | 0.27 |
|             | Two-step-1  | 3     | 0.3116 | 0.00939 | 0.00542 | 0.2882 | 0.3349 | 0.30 | 0.32 |
|             | Two- step-2 | 3     | 0.2470 | 0.03624 | 0.02092 | 0.1570 | 0.3370 | 0.22 | 0.29 |
|             | Two-step-3  | 3     | 0.2226 | 0.02160 | 0.01247 | 0.1690 | 0.2763 | 0.21 | 0.25 |
|             | Total       | 30    | 0.1646 | 0.11808 | 0.02156 | 0.1205 | 0.2087 | 0.00 | 0.32 |
| Two-step-3  | 3           |       | 0.8004 | 0.8004  |         |        |        |      |      |
| MeOH        | 3           |       |        | 1.3432  | 1.3432  |        |        |      |      |
| One-step-2  | 3           |       |        |         | 1.7169  | 1.7169 |        |      |      |
| Two- step-2 | 3           |       |        |         |         | 2.0179 |        |      |      |
| One-step-1  | 3           |       |        |         |         | 2.1150 | 2.1150 |      |      |
| Two-step-1  | 3           |       |        |         |         |        | 2.6078 |      |      |
| Sig.        |             | 1.000 | 1.000  | 0.061   | 0.390   | 0.312  | 0.112  |      |      |

---

**Table S4** Summary of method validation results

| NO. | Analytes | linearity         |                | Accuracy (%)     |                    |              |              |                       |              | Precision (RSD %) |                    |       |       |                          |        | Recovery (%) |               |               | Matrix effect (%) |           |     |           |     |           | Repeatability (%) |              |              |              |
|-----|----------|-------------------|----------------|------------------|--------------------|--------------|--------------|-----------------------|--------------|-------------------|--------------------|-------|-------|--------------------------|--------|--------------|---------------|---------------|-------------------|-----------|-----|-----------|-----|-----------|-------------------|--------------|--------------|--------------|
|     |          | Range<br>(nmol/L) | R <sup>2</sup> | LLOQ<br>(nmol/L) | Within-run (n=6×3) |              |              | Between-runs (n=18×3) |              |                   | Within-run (n=6×3) |       |       | Between-runs<br>(n=18×3) |        |              | LQC<br>(n=6)  | MQC<br>(n=6)  | HQC<br>(n=6)      | LQC (n=6) |     | MQC (n=6) |     | HQC (n=6) |                   | LQC<br>(n=6) | MQC<br>(n=6) | HQC<br>(n=6) |
|     |          |                   |                |                  | LQC                | MQC          | HQC          | LQC                   | MQC          | HQC               | LQC                | MQC   | HQC   | LQC                      | MQC    | HQC          |               |               |                   | Mean      | RSD | Mean      | RSD | Mean      | RSD               |              |              |              |
|     |          |                   |                |                  | (n=6)              | (n=6)        | (n=6)        | (n=18)                | (n=18)       | (n=18)            | (n=6)              | (n=6) | (n=6) | (n=18)                   | (n=18) | (n=18)       |               |               |                   |           |     |           |     |           |                   |              |              |              |
| 1   | ALCA     | 50-2000           | 0.991          | 50               | 83.0-<br>119       | 92.7-<br>110 | 99.3-<br>101 | 81.2-<br>119          | 80.0-<br>118 | 94.2-<br>118      | 11                 | 5.8   | 0.5   | 11                       | 7.7    | 8.6          | 34.4-<br>40.6 | 39.6-<br>47.7 | 47.6-<br>52.9     | 103       | 7.5 | 105       | 7.1 | 101       | 8.4               | 4.2          | 5.5          | 3.2          |
| 2   | LCA      | 50-2000           | 0.995          | 50               | 88.9-<br>116       | 88.9-<br>116 | 89.5-<br>104 | 83.6-<br>116          | 80.5-<br>118 | 80.9-<br>117      | 8.5                | 8.5   | 5.0   | 11                       | 10     | 12           | 30.6-<br>36.3 | 39.4-<br>41.6 | 38.2-<br>45.8     | 96.2      | 5.4 | 98.4      | 6.5 | 103       | 3.0               | 15           | 4.1          | 11           |
| 3   | NDCA     | 50-2000           | 0.996          | 50               | 87.2-<br>106       | 91.4-<br>119 | 101-<br>113  | 87.2-<br>109          | 82.5-<br>119 | 87.1-<br>115      | 8.0                | 9.2   | 3.6   | 7.1                      | 9.9    | 7.7          | 67.0-<br>72.4 | 65.8-<br>72.4 | 69.4-<br>76.3     | 109       | 4.6 | 95.1      | 4.3 | 102       | 5.4               | 7.4          | 8.5          | 3.4          |
| 4   | ACA      | 50-2000           | 0.994          | 50               | 98.9-<br>119       | 98.9-<br>114 | 100-<br>117  | 90.9-<br>119          | 81.3-<br>117 | 89.0-<br>117      | 6.1                | 5.3   | 6.3   | 6.8                      | 10     | 4.5          | 75.7-<br>82.0 | 73.7-<br>83.2 | 76.8-<br>80.1     | 104       | 3.7 | 105       | 4   | 108       | 5.5               | 4.6          | 4.5          | 5.3          |
| 5   | IDCA     | 50-2000           | 0.994          | 50               | 93.1-<br>107       | 89.1-<br>115 | 93.1-<br>107 | 81.6-<br>118          | 82.1-<br>115 | 93.1-<br>118      | 4.9                | 10    | 5.0   | 7.5                      | 9.6    | 5.0          | 63.1-<br>71.9 | 63.4-<br>70.6 | 68.3-<br>74.7     | 104       | 4.4 | 91.0      | 2.7 | 97.9      | 8.1               | 7.5          | 6.4          | 4.4          |
| 6   | UDCA     | 2-2000            | 0.995          | 2                | 86.8-<br>102       | 95.8-<br>108 | 92.2-<br>112 | 82.6-<br>113          | 87.4-<br>109 | 85.5-<br>112      | 6.3                | 4.7   | 6.6   | 9.5                      | 9.1    | 7.8          | 70.3-<br>77.1 | 74.5-<br>82.4 | 75.5-<br>81.9     | 104       | 3.9 | 94.8      | 3.3 | 104       | 4.0               | 5.9          | 5.2          | 6.1          |
| 7   | HDCA     | 50-2000           | 0.997          | 50               | 83.3-<br>106       | 89.1-<br>115 | 93.1-<br>107 | 83.3-<br>112          | 81.1-<br>118 | 82.3-<br>110      | 8.5                | 10    | 4.9   | 9.4                      | 13     | 8.8          | 70.1-<br>78.4 | 64.9-<br>69.4 | 68.3-<br>76.1     | 101       | 7.6 | 91.1      | 5.1 | 104       | 6.2               | 4.7          | 5.9          | 2.5          |
| 8   | CDCA     | 2-2000            | 0.994          | 2                | 80.2-<br>105       | 89.3-<br>106 | 94.5-<br>102 | 88.6-<br>110          | 81.2-<br>109 | 81.4-<br>119      | 8.6                | 6.2   | 2.4   | 7.6                      | 10     | 8.9          | 72.3-<br>79.9 | 75.1-<br>83.8 | 70.8-<br>78.6     | 98.4      | 8.7 | 93.6      | 6.5 | 97.4      | 5.2               | 5.6          | 4.3          | 2.9          |
| 9   | ω-MA     | 2-2000            | 0.993          | 2                | 94.1-<br>105       | 90.2-<br>108 | 93.1-<br>102 | 87.1-<br>115          | 81.2-<br>119 | 84.4-<br>111      | 3.9                | 6.3   | 3.7   | 7.5                      | 13     | 8.9          | 74.4-<br>81.1 | 76.8-<br>87.5 | 77.9-<br>85.9     | 103       | 1.7 | 93.5      | 5.9 | 97.2      | 8.2               | 5.7          | 2.0          | 6.0          |
| 10  | α-MA     | 2-2000            | 0.994          | 2                | 84.1-<br>112       | 84.8-<br>105 | 86.3-<br>102 | 82.4-<br>116          | 84.8-<br>116 | 86.0-<br>111      | 9.4                | 7.6   | 7.6   | 14                       | 11     | 8.8          | 80.9-<br>87.5 | 76.7-<br>84.8 | 75.4-<br>80.4     | 101       | 4.2 | 93.4      | 5.8 | 104       | 6.0               | 6.7          | 7.1          | 5.6          |

|    |                |          |       |     |          |           |           |          |          |          |     |     |     |     |     |     |           |           |           |      |     |      |     |      |     |     |     |     |
|----|----------------|----------|-------|-----|----------|-----------|-----------|----------|----------|----------|-----|-----|-----|-----|-----|-----|-----------|-----------|-----------|------|-----|------|-----|------|-----|-----|-----|-----|
| 11 | $\beta$ -MA    | 2-2000   | 0.995 | 2   | 83.7-105 | 81.4-112  | 84.2-94.6 | 83.7-120 | 81.4-118 | 84.2-112 | 8.0 | 9.4 | 3.6 | 7.9 | 4.7 | 7.9 | 72.0-77.9 | 73.0-78.6 | 76.4-79.8 | 96.7 | 7.7 | 100  | 4.7 | 104  | 5.2 | 5.7 | 5.3 | 4.4 |
| 12 | $\gamma$ -MA   | 2-2000   | 0.991 | 2   | 90.3-111 | 85.0-111  | 82.5-97.7 | 84.1-116 | 81.3-115 | 82.5-110 | 7.4 | 9.3 | 6.2 | 10  | 7.8 | 6.4 | 73.9-79.0 | 78.8-81.2 | 74.3-78.0 | 103  | 6.1 | 98.1 | 7.1 | 105  | 3.2 | 4.6 | 3.4 | 5.8 |
| 13 | CA             | 2-2000   | 0.999 | 2   | 90.5-108 | 88.3-109  | 92.4-105  | 86.2-110 | 88.3-112 | 92.4-112 | 7.4 | 7.6 | 4.7 | 9.0 | 4.9 | 2.4 | 71.4-77.8 | 73.0-78.1 | 78.0-83.0 | 98.6 | 3.7 | 104  | 7.8 | 102  | 5.9 | 6.2 | 4.7 | 4.9 |
| 14 | DLCA           | 50-2000  | 0.992 | 50  | 90.3-110 | 103-116   | 99.4-111  | 86.6-115 | 80.2-116 | 86.5-111 | 7.8 | 4.4 | 3.5 | 8.7 | 10  | 8.3 | 70.9-79.3 | 70.1-75.2 | 72.9-77.6 | 104  | 7.5 | 102  | 4.5 | 97.6 | 6.0 | 3.2 | 3.2 | 2.9 |
| 15 | $\beta$ -DCDCA | 50-2000  | 0.991 | 50  | 96.3-115 | 101-119   | 88.7-106  | 80.4-115 | 81.9-119 | 87.1-116 | 6.8 | 5.5 | 6.2 | 12  | 6.4 | 10  | 61.3-72.6 | 60.4-67.2 | 62.8-69.3 | 98.1 | 7.2 | 96.1 | 3.2 | 106  | 4.6 | 2.1 | 5.8 | 5.7 |
| 16 | DCDCA          | 50-2000  | 0.995 | 50  | 86.0-106 | 80.4-92.3 | 91.0-108  | 86.0-110 | 80.4-108 | 82.8-117 | 7.4 | 4.6 | 5.6 | 6.2 | 9.0 | 9.6 | 69.7-76.6 | 65.8-72.0 | 67.9-72.2 | 107  | 3.6 | 95.0 | 3.6 | 106  | 4.1 | 7.1 | 7.8 | 6.3 |
| 17 | AlloCA         | 50-2000  | 0.995 | 50  | 83.8-112 | 82.1-110  | 87.2-110  | 83.8-118 | 82.1-110 | 87.2-113 | 10  | 11  | 8.4 | 8.4 | 7.6 | 8.0 | 75.3-81.1 | 76.4-82.4 | 76.6-80.7 | 102  | 1.7 | 102  | 8.3 | 91.7 | 4.0 | 2.3 | 2.2 | 4.0 |
| 18 | 12k-LCA        | 50-2000  | 0.994 | 50  | 88.5-109 | 84.4-109  | 85.9-95.3 | 84.9-109 | 83.5-110 | 82.6-106 | 6.7 | 7.6 | 3.4 | 4.9 | 8.6 | 6.5 | 69.5-78.1 | 68.9-76.5 | 69.7-76.0 | 105  | 5.0 | 99.8 | 8.0 | 97.6 | 6.1 | 8.2 | 4.1 | 5.2 |
| 19 | 3,7,12-Trione  | 50-2000  | 0.993 | 50  | 84.4-120 | 83.0-132  | 96.8-107  | 84.4-120 | 80.9-117 | 84.9-111 | 12  | 17  | 3.4 | 11  | 12  | 9.4 | 29.9-35.2 | 35.1-39.4 | 33.9-37.1 | 102  | 7.6 | 87.8 | 2.0 | 105  | 4.3 | 11  | 4.8 | 9.6 |
| 20 | 7,12 dk-LCA    | 20-2000  | 0.994 | 20  | 88.5-112 | 84.4-109  | 85.9-99.9 | 88.5-115 | 84.4-109 | 83.6-115 | 7.6 | 7.6 | 4.8 | 6.9 | 4.7 | 8.5 | 69.9-75.9 | 66.9-73.6 | 63.1-71.0 | 105  | 7.4 | 105  | 4.0 | 102  | 6.2 | 14  | 8.1 | 4.4 |
| 21 | Methyl Ester   | 100-2000 | 0.992 | 100 | 81.5-118 | 83.1-103  | 94.3-101  | 81.5-118 | 83.1-115 | 83.6-108 | 12  | 6.6 | 2.4 | 6.6 | 7.9 | 7.6 | 69.6-76.1 | 71.4-77.5 | 72.5-80.2 | 102  | 9.9 | 101  | 8.1 | 102  | 7.1 | 11  | 8.0 | 7.1 |
| 22 | GLCA           | 2-2000   | 0.997 | 2   | 81.7-109 | 86.6-110  | 98.3-107  | 81.6-115 | 85.4-114 | 85.7-113 | 11  | 8.6 | 2.9 | 7.0 | 6.1 | 8.0 | 75.0-83.8 | 78.4-85.3 | 79.5-86.3 | 105  | 4.6 | 102  | 7.8 | 107  | 3.0 | 8.9 | 6.1 | 4.3 |
| 23 | GUDCA          | 2-2000   | 0.991 | 2   | 97.1-112 | 83.5-97.4 | 82.3-103  | 93.0-114 | 83.5-112 | 82.3-119 | 4.7 | 5.9 | 7.1 | 7.0 | 5.1 | 6.6 | 73.4-79.3 | 72.8-80.7 | 77.5-83.6 | 105  | 6.1 | 102  | 5.7 | 112  | 3.3 | 6.9 | 6.5 | 4.9 |

|    |                            |        |       |   |               |               |               |              |              |              |     |     |     |     |     |     |               |               |               |      |     |      |     |       |     |     |     |     |
|----|----------------------------|--------|-------|---|---------------|---------------|---------------|--------------|--------------|--------------|-----|-----|-----|-----|-----|-----|---------------|---------------|---------------|------|-----|------|-----|-------|-----|-----|-----|-----|
| 24 | GCDCa                      | 2-2000 | 0.994 | 2 | 103-<br>109   | 84.7-<br>95.3 | 89.0-<br>102  | 99.1-<br>109 | 82.0-<br>115 | 89.0-<br>118 | 1.6 | 4.0 | 5.1 | 8.0 | 10  | 4.2 | 76.5-<br>83.2 | 76.4-<br>83.4 | 74.3-<br>80.9 | 94.1 | 5.2 | 96.8 | 5.2 | 96.3  | 2.4 | 6.1 | 5.1 | 4.0 |
| 25 | GDCA                       | 2-2000 | 0.997 | 2 | 102-<br>111   | 80.4-<br>94.9 | 81.3-<br>93.6 | 85.4-<br>115 | 80.4-<br>116 | 81.3-<br>119 | 3.2 | 5.9 | 5.1 | 5.9 | 10  | 2.8 | 67.5-<br>74.0 | 72.3-<br>76.7 | 67.5-<br>70.4 | 95.8 | 8.1 | 101  | 4.8 | 98.1  | 6.6 | 5.3 | 4.8 | 7.7 |
| 26 | Gβ-MA                      | 2-2000 | 0.995 | 2 | 84.8-<br>105  | 84.4-<br>113  | 81.2-<br>107  | 82.6-<br>117 | 81.8-<br>118 | 81.2-<br>107 | 6.9 | 10  | 11  | 8.0 | 8.1 | 6.5 | 70.9-<br>78.6 | 73.2-<br>79.8 | 75.2-<br>83.3 | 106  | 3.8 | 100  | 4.5 | 104   | 4.0 | 7.3 | 8.3 | 7.6 |
| 27 | GCA                        | 2-2000 | 0.997 | 2 | 94.2-<br>107  | 82.4-<br>105  | 91.6-<br>108  | 94.2-<br>111 | 80.2-<br>113 | 88.6-<br>110 | 4.0 | 8.1 | 6.4 | 4.6 | 9.7 | 7.1 | 73.2-<br>83.5 | 78.1-<br>85.6 | 76.0-<br>84.9 | 106  | 5.9 | 99.5 | 4.3 | 106.8 | 4.6 | 7.0 | 3.3 | 4.0 |
| 28 | Gly-3, 7,<br>12-<br>Trione | 2-2000 | 0.99  | 2 | 80.8-<br>98.9 | 87.9-<br>104  | 104-<br>107   | 80.8-<br>117 | 83.2-<br>117 | 88.6-<br>110 | 7.6 | 7.1 | 1.1 | 9.9 | 12  | 5.0 | 75.6-<br>83.5 | 78.0-<br>83.1 | 71.6-<br>75.0 | 97.3 | 5.2 | 98.3 | 5.3 | 93.1  | 4.6 | 6.8 | 7.1 | 6.0 |
| 29 | TLCA                       | 2-2000 | 0.998 | 2 | 93.4-<br>112  | 81.9-<br>98.0 | 93.8-<br>113  | 89.0-<br>114 | 81.9-<br>109 | 86.4-<br>113 | 6.4 | 6.7 | 6.4 | 1.8 | 5.8 | 6.1 | 80.2-<br>86.8 | 77.7-<br>84.7 | 78.7-<br>84.5 | 101  | 10  | 106  | 4.1 | 105   | 4.6 | 6.9 | 1.6 | 4.3 |
| 30 | TDCA                       | 2-2000 | 0.994 | 2 | 93.1-<br>105  | 81.8-<br>93.6 | 82.4-<br>98.5 | 93.1-<br>107 | 81.8-<br>120 | 82.4-<br>113 | 4.1 | 11  | 5.2 | 7.7 | 9.9 | 7.1 | 72.1-<br>77.2 | 70.3-<br>74.6 | 72.5-<br>79.2 | 108  | 6.5 | 93.8 | 3.4 | 103   | 6.8 | 8.9 | 5.2 | 5.2 |
| 31 | TUDCA                      | 2-2000 | 0.993 | 2 | 101-<br>113   | 80.2-<br>115  | 98.6-<br>116  | 88.8-<br>113 | 80.2-<br>115 | 87.9-<br>116 | 4.1 | 11  | 5.2 | 8.5 | 9.2 | 7.9 | 80.2-<br>84.6 | 79.0-<br>84.2 | 81.2-<br>87.4 | 94.0 | 4.7 | 96.8 | 4.1 | 96.4  | 5.9 | 11  | 4.2 | 5.0 |
| 32 | TCDCa                      | 2-2000 | 0.996 | 2 | 96.5-<br>111  | 83.6-<br>107  | 87.9-<br>116  | 90.5-<br>112 | 83.6-<br>114 | 86.9-<br>116 | 4.1 | 8.4 | 9.2 | 3.4 | 5.2 | 6.4 | 77.1-<br>84.8 | 80.0-<br>89.8 | 83.7-<br>89.5 | 94.1 | 6.1 | 102  | 5.7 | 112   | 3.3 | 6.8 | 4.3 | 4.3 |
| 33 | Tβ-MA                      | 2-2000 | 0.999 | 2 | 91.5-<br>113  | 83.2-<br>105  | 99.9-<br>107  | 82.6-<br>118 | 83.2-<br>120 | 93.0-<br>113 | 4.1 | 8.4 | 9.2 | 13  | 9.1 | 7.1 | 80.2-<br>84.6 | 84.7-<br>87.1 | 82.0-<br>87.9 | 93.5 | 6.6 | 108  | 5.5 | 98.9  | 4.3 | 6.1 | 4.5 | 8.2 |
| 34 | THCA                       | 2-2000 | 0.995 | 2 | 94.3-<br>112  | 84.7-<br>109  | 100-<br>112   | 92.5-<br>112 | 83.0-<br>119 | 86.1-<br>115 | 4.3 | 5.5 | 6.7 | 6.8 | 12  | 10  | 78.5-<br>85.4 | 81.0-<br>85.6 | 82.3-<br>86.8 | 104  | 5.7 | 93.9 | 5.5 | 88.1  | 3.3 | 4.7 | 3.6 | 3.5 |
| 35 | TCA                        | 2-2000 | 0.998 | 2 | 93.3-<br>107  | 81.3-<br>99.3 | 91.8-<br>106  | 88.6-<br>107 | 81.3-<br>104 | 86.9-<br>117 | 5.2 | 5.9 | 5.9 | 7.8 | 5.3 | 10  | 82.2-<br>86.8 | 83.3-<br>86.6 | 86.8-<br>93.5 | 103  | 8.2 | 94.6 | 8.5 | 89.1  | 3.8 | 6.1 | 5.3 | 3.4 |

**Table S5** Summary of stability results.

| NO. | Analyte | Standard solution stability of MQC (%) | Autosampler stability (%) |       | Freeze–thaw stability (%) |       |          |       |          |           | Room-temperature Stability (%) |           | Long-term Stability of LQC and HQC (%) |           |         |         |
|-----|---------|----------------------------------------|---------------------------|-------|---------------------------|-------|----------|-------|----------|-----------|--------------------------------|-----------|----------------------------------------|-----------|---------|---------|
|     |         |                                        | LQC                       | HQC   | 1 cycle                   |       | 2 cycles |       | 3 cycles |           | LQC                            | HQC       | LQC                                    |           | HQC     |         |
|     |         |                                        |                           |       | LQC                       | HQC   | LQC      | HQC   | LQC      | HQC       |                                |           | 14d                                    | 30d       | 14d     | 30d     |
| 1   | ALCA    | 102                                    | 86.9-                     | 96.3- | 91.9-                     | 85.4- | 92.6-    | 89.6- | 85.9-    | 90.2-108  | 89.4-97.3                      | 95.8-103  | 86.8-104                               | 87.7-100  | 99.2-   | 96.6-   |
|     |         |                                        | 103                       | 104   | 114                       | 113   | 109      | 104   | 99.1     |           |                                |           |                                        |           | 106     | 102     |
| 2   | LCA     | 103                                    | 85.2-                     | 87.4- | 97.3-                     | 88.6- | 95.0-    | 97.4- | 87.8-    | 94.9-97.6 | 97.4-105                       | 85.7-95.2 | 90.8-102                               | 93.3-     | 95.3-   |         |
|     |         |                                        | 108                       | 105   | 109                       | 103   | 102-114  | 107   |          |           |                                |           |                                        | 104       | 99.6    | 103     |
| 3   | NDCA    | 91.7                                   | 103-115                   | 85.9- | 89.0-                     | 90.7- | 88.2-    | 86.8- | 97.3-    | 89.6-108  | 92.0-105                       | 88.6-105  | 89.6-92.1                              | 87.0-99.2 | 92.1-   | 91.9-   |
|     |         |                                        | 115                       | 112   | 108                       | 98.1  | 94.8     | 108   | 98.2     |           |                                |           |                                        |           | 103     |         |
| 4   | ACA     | 104                                    | 87.2-                     | 98.7- | 87.9-                     | 91.5- | 93.3-    | 88.6- | 94.3-    | 85.4-100  | 92.4-99.4                      | 90.9-     | 86.4-102                               | 89.4-106  | 93.9-   | 90.1-   |
|     |         |                                        | 113                       | 108   | 109                       | 107   | 101      | 105   | 114      |           |                                | 99.4      |                                        |           | 101     | 97.7    |
| 5   | IDCA    | 100                                    | 91.7-                     | 92.0- | 89.5-                     | 91.5- | 93.5-    | 89.5- | 90.6-    | 87.7-     | 88.7-97.3                      | 93.7-103  | 90.4-106                               | 84.3-105  | 101-107 | 90.9-   |
|     |         |                                        | 111                       | 109   | 111                       | 107   | 111      | 97.1  | 109      | 99.5      |                                |           |                                        |           | 98.6    |         |
| 6   | UDCA    | 91.0                                   | 90.9-                     | 90.3- | 96.8-                     | 91.2- | 94.9-    | 93.9- | 91.1-    | 86.3-     | 91.4-99.8                      | 89.4-     | 92.8-111                               | 102-111   | 102-108 | 104-107 |
|     |         |                                        | 111                       | 104   | 115                       | 110   | 108      | 100   | 106      | 98.1      |                                | 99.7      |                                        |           | 97.1    |         |
| 7   | HDCA    | 96.5                                   | 90.1-                     | 92.1- | 89.4-                     | 93.6- | 91.2-    | 90.6- | 85.5-    | 90.8-104  | 92.4-104                       | 98.1-104  | 96.1-107                               | 84.5-104  | 100-109 | 93.0-   |
|     |         |                                        | 102                       | 106   | 103                       | 111   | 114      | 103   | 96.2     |           |                                |           |                                        |           | 97.1    |         |
| 8   | CDCA    | 98.8                                   | 86.9-                     | 92.8- | 92.5-                     | 92.1- | 87.8-    | 88.3- | 97.3-    | 90.2-105  | 97.5-104                       | 95.4-106  | 97.1-103                               | 96.3-100  | 90.2-   | 102-109 |
|     |         |                                        | 95.7                      | 105   | 105                       | 111   | 113      | 106   | 102      |           |                                |           |                                        |           | 98.4    |         |
| 9   | ω-MA    | 94.4                                   | 86.8-                     | 86.0- | 87.5-                     | 86.9- | 96.0-    | 89.3- | 96.6-    | 87.1-103  | 89.0-90.3                      | 95.1-101  | 86.8-114                               | 86.4-113  | 95.8-   | 101-108 |
|     |         |                                        | 98.2                      | 99.7  | 91.8                      | 104   | 103      | 96.4  | 113      |           |                                |           |                                        |           | 103     |         |



|    |                |      |           |           |           |           |           |           |           |           |           |           |           |           |           |           |
|----|----------------|------|-----------|-----------|-----------|-----------|-----------|-----------|-----------|-----------|-----------|-----------|-----------|-----------|-----------|-----------|
| 10 | $\alpha$ -MA   | 94.0 | 85.2-106  | 93.1-105  | 96.1-108  | 88.2-109  | 87.5-95.3 | 94.9-98.5 | 94.1-99.9 | 89.0-104  | 92.3-103  | 94.1-98.3 | 92.6-109  | 86.0-113  | 93.2-104  | 101-104   |
| 11 | $\beta$ -MA    | 103  | 87.4-102  | 93.2-102  | 91.4-105  | 88.1-104  | 85.9-109  | 86.4-99.3 | 92.0-105  | 90.7-102  | 89.8-101  | 95.1-98.0 | 97.1-104  | 85.6-105  | 95.7-102  | 97.9-106  |
| 12 | $\gamma$ -MA   | 91.8 | 85.9-94.2 | 95.7-107  | 88.2-108  | 85.5-101  | 91.8-111  | 89.7-95.8 | 93.5-107  | 93.1-108  | 100-101   | 100-102   | 87.2-106  | 95.4-113  | 95.0-104  | 93.2-95.5 |
| 13 | CA             | 92.7 | 87.6-109  | 90.2-109  | 87.9-106  | 89.9-106  | 91.7-103  | 92.4-105  | 90.0-108  | 91.0-99.7 | 85.6-109  | 92.5-97.4 | 88.9-106  | 86.9-106  | 96.5-105  | 90.6-100  |
| 14 | DLCA           | 95.3 | 97.0-109  | 86.8-97.9 | 91.6-103  | 85.1-104  | 88.9-97.6 | 90.5-107  | 87.0-94.9 | 98.3-109  | 98.1-102  | 100-101   | 106-116   | 87.0-88.9 | 88.0-104  | 95.9-97.9 |
| 15 | $\beta$ -DCDCA | 99.9 | 94.7-106  | 95.7-109  | 95.7-102  | 98.5-112  | 97.3-103  | 103-113   | 94.6-98.9 | 89.1-106  | 98.0-103  | 93.0-105  | 98.3-103  | 97.4-104  | 88.9-106  | 96.5-105  |
| 16 | DCDCA          | 98.3 | 85.5-97.8 | 90.9-113  | 94.2-109  | 91.6-105  | 90.5-100  | 96.6-109  | 93.2-105  | 87.3-105  | 98.8-104  | 93.2-105  | 87.8-99.2 | 85.7-96.6 | 88.9-102  | 94.4-98.0 |
| 17 | AlloCA         | 97.7 | 93.1-108  | 86.5-106  | 85.3-93.5 | 86.7-93.2 | 96.1-103  | 87.5-104  | 87.6-102  | 95.2-109  | 96.5-100  | 93.3-102  | 85.6-109  | 90.0-102  | 86.9-104  | 92.1-94.0 |
| 18 | 12k-LCA        | 96.4 | 87.5-93.4 | 91.5-102  | 96.7-106  | 92.9-104  | 99.4-114  | 87.8-97.6 | 90.6-113  | 95.2-114  | 102-107   | 92.6-105  | 104-111   | 96.0-99.3 | 98.9-105  | 95.1-101  |
| 19 | 3,7,12-Trione  | 101  | 90.2-113  | 89.9-100  | 93.9-103  | 87.5-98.0 | 88.0-95.9 | 86.3-94.7 | 97.0-105  | 86.3-111  | 96.5-100  | 94.4-103  | 90.1-103  | 88.8-99.3 | 95.6-108  | 87.3-92.1 |
| 20 | 7,12 dk-LCA    | 101  | 89.9-105  | 91.9-108  | 94.6-107  | 93.2-112  | 90.8-115  | 86.8-98.3 | 92.7-108  | 94.7-104  | 96.5-101  | 93.3-101  | 100-113   | 91.4-95.5 | 90.4-106  | 90.8-105  |
| 21 | Methyl Ester   | 102  | 87.9-97.4 | 94.7-106  | 95.7-103  | 87.0-103  | 90.0-99.1 | 90.9-114  | 87.2-106  | 89.2-101  | 92.3-95.3 | 91.0-96.6 | 84.4-105  | 87.9-102  | 97.3-101  | 93.4-101  |
| 22 | GLCA           | 100  | 92.3-107  | 94.5-102  | 90.2-112  | 93.3-109  | 85.5-105  | 89.0-98.5 | 88.4-111  | 91.4-102  | 96.5-111  | 94.5-102  | 84.2-95.8 | 96.3-114  | 88.7-98.3 | 102-103   |

|    |                         |       |               |               |               |               |               |               |               |               |           |               |           |           |               |               |
|----|-------------------------|-------|---------------|---------------|---------------|---------------|---------------|---------------|---------------|---------------|-----------|---------------|-----------|-----------|---------------|---------------|
| 23 | GUDCA                   | 99.4  | 88.6-<br>98.9 | 95.3-<br>111  | 86.6-<br>110  | 88.8-<br>104  | 93.1-<br>98.8 | 86.9-<br>91.8 | 91.6-<br>109  | 88.9-<br>98.6 | 91.2-91.6 | 90.3-<br>94.1 | 88.8-99.3 | 87.8-101  | 87.3-<br>92.1 | 94.0-<br>98.3 |
| 24 | GCDCA                   | 112   | 103-110       | 88.0-<br>105  | 89.2-<br>110  | 94.2-<br>112  | 86.3-<br>95.4 | 89.3-<br>106  | 96.2-<br>105  | 93.0-100      | 89.8-110  | 96.4-<br>99.0 | 85.7-96.6 | 86.4-94.5 | 94.4-<br>98.0 | 96.0-<br>105  |
| 25 | GDCA                    | 102   | 93.7-<br>108  | 90.0-<br>109  | 89.6-<br>114  | 91.4-<br>109  | 102-114       | 90.6-<br>98.6 | 86.2-<br>102  | 88.2-103      | 85.3-93.3 | 93.2-<br>96.3 | 96.1-102  | 94.8-106  | 89.9-<br>101  | 91.2-<br>103  |
| 26 | Gβ-MA                   | 96.0  | 87.0-<br>109  | 95.9-<br>105  | 95.5-<br>105  | 92.8-<br>114  | 98.8-<br>110  | 91.7-<br>103  | 96.0-<br>105  | 90.7-111      | 85.4-91.5 | 90.7-<br>98.8 | 85.6-99.2 | 86.8-109  | 92.1-<br>94.5 | 94.4-<br>104  |
| 27 | GCA                     | 101   | 98.5-<br>112  | 88.1-<br>104  | 86.7-<br>112  | 89.1-<br>107  | 92.9-<br>96.7 | 97.3-<br>106  | 94.1-<br>108  | 95.3-102      | 88.8-94.2 | 91.0-<br>95.1 | 84.3-105  | 89.5-107  | 90.9-<br>98.6 | 91.9-<br>94.5 |
| 28 | Gly-3, 7, 12-<br>Trione | 96.8  | 86.1-<br>102  | 95.6-<br>101  | 88.3-<br>115  | 86.8-<br>102  | 85.5-<br>113  | 90.7-<br>99.0 | 96.3-<br>105  | 94.7-104      | 88.9-93.4 | 94.2-<br>98.3 | 101-105   | 88.7-98.3 | 93.6-<br>106  | 91.6-<br>95.0 |
| 29 | TLCA                    | 97.9  | 106-118       | 90.4-<br>102  | 86.9-<br>113  | 94.2-<br>104  | 86.5-<br>99.9 | 88.1-<br>105  | 95.6-<br>112  | 94.3-109      | 87.1-93.6 | 89.5-<br>93.3 | 86.9-104  | 85.2-102  | 92.1-<br>94.0 | 91.8-<br>99.8 |
| 30 | TDCA                    | 94.1  | 106-115       | 87.0-<br>105  | 85.6-<br>100  | 91.4-<br>110  | 88.7-<br>105  | 95.5-<br>106  | 105-110       | 87.5-104      | 95.1-114  | 90.6-<br>94.6 | 84.5-104  | 92.0-98.6 | 93.0-<br>97.1 | 98.0-<br>99.9 |
| 31 | TUDCA                   | 103.1 | 85.6-<br>99.1 | 95.3-<br>102  | 93.0-<br>97.4 | 94.3-<br>109  | 94.4-<br>110  | 93.5-<br>103  | 89.3-<br>104  | 86.9-101      | 92.9-110  | 91.2-<br>95.7 | 90.8-102  | 91.8-103  | 95.3-<br>101  | 96.9-<br>101  |
| 32 | TCDCa                   | 103.2 | 106-109       | 92.1-<br>102  | 87.2-<br>99.4 | 89.7-<br>105  | 100-109       | 86.5-<br>101  | 87.7-<br>107  | 87.1-101      | 92.1-99.8 | 90.5-<br>96.6 | 89.4-106  | 89.0-106  | 90.1-<br>97.7 | 89.2-<br>97.6 |
| 33 | Tβ-MA                   | 106.3 | 92.9-<br>102  | 87.3-<br>105  | 86.2-<br>99.2 | 91.2-<br>104  | 88.5-<br>108  | 92.2-<br>107  | 91.9-<br>102  | 87.1-<br>95.9 | 89.4-94.2 | 89.1-<br>95.7 | 89.8-97.6 | 87.3-108  | 88.3-<br>101  | 103-106       |
| 34 | THCA                    | 99.0  | 110-115       | 93.7-<br>98.0 | 98.5-<br>105  | 86.1-<br>112  | 97.1-<br>105  | 87.8-<br>94.8 | 95..8-<br>108 | 85.8-108      | 94.6-103  | 93.2-102      | 87.7-100  | 98.2-111  | 96.6-<br>102  | 95.1-<br>101  |
| 35 | TCA                     | 102.2 | 93.6-<br>109  | 96.4-<br>106  | 87.3-<br>105  | 89.5-<br>98.7 | 88.6-<br>96.7 | 86.0-<br>101  | 97.0-<br>111  | 86.2-<br>92.9 | 89.0-93.7 | 96.1-<br>98.2 | 87.0-99.2 | 92.4-102  | 91.9-<br>103  | 91.1-<br>98.2 |

**Table S6** Summary of BAs quantitation results

| NO. | Analytes     | Con1 | Con2 | Con3 | Con4 | Con5 | Con6 | Average of<br>Con group | ANIT1 | ANIT2 | ANIT3 | ANIT4 | ANIT5 | ANIT6 | Average<br>of ANIT<br>group | T-test<br>Value |
|-----|--------------|------|------|------|------|------|------|-------------------------|-------|-------|-------|-------|-------|-------|-----------------------------|-----------------|
| 1   | CA           | 1368 | 1328 | 1364 | 1104 | 1291 | 1523 | 1330                    | 19826 | 5555  | 14064 | 9131  | 10792 | 36422 | 15965.07                    | 9.14E-03        |
| 2   | $\alpha$ -MA | 1247 | 984  | 871  | 1069 | 1293 | 947  | 1069                    | 4804  | 2403  | 5920  | 3947  | 4120  | 2185  | 3896.33                     | 6.90E-04        |
| 3   | $\beta$ -MA  | 859  | 441  | 493  | 851  | 900  | 1225 | 795                     | 4928  | 3261  | 4430  | 3656  | 3799  | 4002  | 4012.59                     | 3.00E-07        |
| 4   | $\omega$ -MA | 518  | 497  | 92   | 572  | 384  | 818  | 480                     | 433   | 663   | 565   | 818   | 618   | 529   | 604.18                      | 2.90E-01        |
| 5   | CDCA         | 517  | 624  | 802  | 581  | 770  | 674  | 661                     | 114   | 114   | 112   | 48    | 122   | 311   | 136.81                      | 3.88E-06        |
| 6   | UDCA         | 161  | 229  | 288  | 270  | 260  | 227  | 239                     | 737   | 360   | 722   | 362   | 630   | 541   | 558.77                      | 1.17E-03        |
| 7   | HDCA         | 517  | 624  | 82   | 581  | 370  | 674  | 475                     | 110   | 114   | 74    | 88    | 211   | 143   | 123.33                      | 3.32E-03        |
| 8   | GCA          | 1675 | 1640 | 1456 | 1639 | 1846 | 1294 | 1592                    | 12440 | 11355 | 11884 | 11121 | 12488 | 12149 | 11906.28                    | 1.32E-12        |
| 9   | GCDCA        | 258  | 88   | 245  | 198  | 87   | 137  | 169                     | 2694  | 2268  | 2872  | 2766  | 2899  | 2409  | 2651.18                     | 6.23E-10        |
| 10  | GDCA         | 29   | 39   | 17   | 25   | 29   | 11   | 25                      | 576   | 195   | 100   | 56    | 125   | 218   | 211.72                      | 3.58E-02        |
| 11  | GUDCA        | 3    | 2    | 3    | 3    | 2    | 4    | 3                       | 17    | 23    | 16    | 31    | 39    | 25    | 25.36                       | 7.32E-05        |

|    |                        |      |      |      |      |      |      |      |            |            |            |            |            |            |               |              |
|----|------------------------|------|------|------|------|------|------|------|------------|------------|------------|------------|------------|------------|---------------|--------------|
| 12 | TCA                    | 1368 | 162  | 1364 | 1104 | 1000 | 1523 | 1087 | 29826<br>6 | 30755<br>5 | 40406<br>4 | 21093<br>1 | 27999<br>2 | 36412<br>2 | 310821.7<br>3 | 5.23E-<br>07 |
| 13 | Tα-MA                  | 518  | 42   | 354  | 43   | 524  | 412  | 315  | 25822      | 32383      | 40735      | 34022      | 23495      | 27156      | 30602.28      | 3.88E-<br>07 |
| 14 | Tβ-MA                  | 74   | 43   | 84   | 30   | 143  | 47   | 70   | 35608      | 36175      | 35668      | 36039      | 34120      | 37234      | 35807.33      | 1.06E-<br>15 |
| 15 | TCDCa                  | 72   | 57   | 92   | 36   | 179  | 143  | 96   | 4756       | 4533       | 4537       | 4117       | 4529       | 4145       | 4436.06       | 1.66E-<br>12 |
| 16 | TDCA                   | 74   | 6    | 92   | 2    | 92   | 137  | 67   | 6568       | 4535       | 5539       | 3567       | 5413       | 4246       | 4977.84       | 5.59E-<br>07 |
| 17 | TUDCA                  | 6    | 3    | 8    | 7    | 7    | 4    | 6    | 73         | 56         | 56         | 75         | 29         | 63         | 58.58         | 1.62E-<br>05 |
| 18 | Nonconjugate<br>d      | 5189 | 4727 | 3993 | 5029 | 5269 | 6087 | 5049 | 30952      | 12469      | 25887      | 18049      | 20293      | 44132      | 25297.09      | 1.31E-<br>03 |
| 19 | Glycine-<br>conjugated | 1965 | 1768 | 1721 | 1865 | 1965 | 1446 | 1788 | 15728      | 13841      | 14872      | 13975      | 15552      | 14801      | 14794.54      | 2.47E-<br>12 |
| 20 | Taurine-<br>conjugated | 2112 | 313  | 1994 | 1222 | 1945 | 2266 | 1642 | 37109<br>3 | 38523<br>8 | 49059<br>9 | 28875<br>1 | 34757<br>8 | 43696<br>5 | 386703.8<br>2 | 1.01E-<br>07 |
| 21 | Total                  | 9266 | 6808 | 7707 | 8116 | 9179 | 9799 | 8479 | 41777<br>3 | 41154<br>8 | 53135<br>8 | 32077<br>5 | 38342<br>2 | 49589<br>8 | 426795.4<br>6 | 1.01E-<br>07 |

---
